# Supplementary material for: Modelling the household cost of paediatric malaria treatment in a rural county in Kenya: do non-user fee payments matter? A partial cost of illness analysis
Source: PubMed Central journal article supplement — BMJ Open. 2020 Mar 23;10(3):e033192. doi: 10.1136/bmjopen-2019-033192 (PMC7103840; doi:10.1136/bmjopen-2019-033192), 2020-03-23
Supplement: bmjopen-2019-033192.draft_revisions.pdf [file bmjopen-2019-033192.draft_revisions.pdf]

# BMJ Open

BMJ Open is committed to open peer review. As part of this commitment we make the peer review history of every article we publish publicly available.

When an article is published we post the peer reviewers' comments and the authors' responses online. We also post the versions of the paper that were used during peer review. These are the versions that the peer review comments apply to.

The versions of the paper that follow are the versions that were submitted during the peer review process. They are not the versions of record or the final published versions. They should not be cited or distributed as the published version of this manuscript.

BMJ Open is an open access journal and the full, final, typeset and author-corrected version of record of the manuscript is available on our site with no access controls, subscription charges or pay-per-view fees (<http://bmjopen.bmj.com>).

If you have any questions on BMJ Open's open peer review process please email [info.bmjopen@bmj.com](mailto:info.bmjopen@bmj.com)

# BMJ Open

## Modelling the cost of Paediatric Malaria Treatment in a Rural County in Kenya; Do Indirect Costs Matter? A cross sectional Survey

|                               |                                                                                                                                                                                       |
|-------------------------------|---------------------------------------------------------------------------------------------------------------------------------------------------------------------------------------|
| Journal:                      | <i>BMJ Open</i>                                                                                                                                                                       |
| Manuscript ID                 | bmjopen-2019-033192                                                                                                                                                                   |
| Article Type:                 | Research                                                                                                                                                                              |
| Date Submitted by the Author: | 24-Jul-2019                                                                                                                                                                           |
| Complete List of Authors:     | Kodhiambo, Maurice; Kenyatta University, Pharmacy<br>Oyugi, Julius; University of Nairobi, Medical Microbiology<br>Amugune, Beatrice; University of Nairobi, Pharmaceutical Chemistry |
| Keywords:                     | Health economics < HEALTH SERVICES ADMINISTRATION & MANAGEMENT, Public health < INFECTIOUS DISEASES, Community child health < PAEDIATRICS                                             |
|                               |                                                                                                                                                                                       |

SCHOLARONE™  
Manuscripts

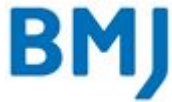

I, the Submitting Author has the right to grant and does grant on behalf of all authors of the Work (as defined in the below author licence), an exclusive licence and/or a non-exclusive licence for contributions from authors who are: i) UK Crown employees; ii) where BMJ has agreed a CC-BY licence shall apply, and/or iii) in accordance with the terms applicable for US Federal Government officers or employees acting as part of their official duties; on a worldwide, perpetual, irrevocable, royalty-free basis to BMJ Publishing Group Ltd ("BMJ") its licensees and where the relevant Journal is co-owned by BMJ to the co-owners of the Journal, to publish the Work in this journal and any other BMJ products and to exploit all rights, as set out in our [licence](#).

The Submitting Author accepts and understands that any supply made under these terms is made by BMJ to the Submitting Author unless you are acting as an employee on behalf of your employer or a postgraduate student of an affiliated institution which is paying any applicable article publishing charge ("APC") for Open Access articles. Where the Submitting Author wishes to make the Work available on an Open Access basis (and intends to pay the relevant APC), the terms of reuse of such Open Access shall be governed by a Creative Commons licence – details of these licences and which [Creative Commons](#) licence will apply to this Work are set out in our licence referred to above.

Other than as permitted in any relevant BMJ Author's Self Archiving Policies, I confirm this Work has not been accepted for publication elsewhere, is not being considered for publication elsewhere and does not duplicate material already published. I confirm all authors consent to publication of this Work and authorise the granting of this licence.

## Modelling the cost of Paediatric Malaria Treatment in a Rural County in Kenya; Do Indirect Costs Matter? A cross sectional Survey

Maurice Onditi Kodhiambo<sup>1</sup>, Julius Otieno Oyugi<sup>2</sup> and Beatrice Kagai Amugune<sup>3</sup>

1. School of Pharmacy, Kenyatta University, P.O. Box 43844-00100, Nairobi, Kenya., Cell Phone-+254724468162, Email: [kodhiambo.maurice@ku.ac.ke](mailto:kodhiambo.maurice@ku.ac.ke) **Corresponding Author**
2. Department of Medical Microbiology, University of Nairobi, Nairobi, Kenya. Email: [julias.oyugi9@gmail.com](mailto:julias.oyugi9@gmail.com)
3. Department of Pharmaceutical Chemistry, University of Nairobi, Nairobi, Kenya. Email [beatrice.amugune@uonbi.ac.ke](mailto:beatrice.amugune@uonbi.ac.ke)

**Word Count** – 4860 including tables and references

### ABSTRACT

**Objective:** The objective of this study was to develop a comprehensive model for the cost of treatment of paediatric malaria in a resource strained rural setting; Homa-Bay county, Kenya. We sought to investigate the main contributors of total cost and the contribution of indirect costs to the total cost of care.

**Design:** A health facility based cross sectional survey targeting paediatric patients.

**Setting:** The study was conducted in 13 health facilities ranging from level II to level V in Homa Bay County which is in the Eastern shores of Lake Victoria, Kenya.

**Participants:** The study enrolled 254 children (139 males and 115 females) all of who completed the study.

**Primary and secondary outcome measures:** The primary outcome measure was the total cost of care for paediatric malaria. This was measured through a verbal autopsy from an exit interview with caregivers of children

**Results:** A total of consented 254 respondents from 13 health facilities were interviewed. Age, number of days spent at the health facility, being treated at a level V facility, medical officer prescribing and seeking initial treatment from a retail shop were found significant predictors of cost.

**Conclusion** Higher level health facilities in Homa-Bay County are more costly hence barring the poorest from obtaining paediatric malaria care from here where the more specialized medical workers are stationed. Indirect intangible costs may burden patients even when direct fees are have been waived in public government facilities.

**Keywords:** Modeling, Cost of treatment, Paediatric malaria, Homa-Bay

## Strengths and limitations of this study

### Strengths

- This study was conducted only four years after implementation of devolution of health in Kenya. It is therefore a very early attempt to investigate health systems performance post devolution.
- Many previous malaria costing studies have focused on either direct costs only or adult patients only. This study includes both direct and indirect costs including opportunity cost of time lost for caring for the patient.
- Robust statistical analysis using stepwise regression analysis thereby taking care of any possible confounders to the study findings

### Weaknesses

- The data was collected solely by verbal autopsy through exit interview of caregivers. This may weaken validity of the findings as some respondents may have been fatigued by the stay in the hospital
- The study was conducted in one county and yet the counties in Kenya are varied geographically and socioeconomically. This limits the generalisability of the findings

### Funding

This research received no specific grant from any funding agency in the public, commercial or not-for-profit sectors'

## INTRODUCTION

Cost of health care services in sub-Saharan Africa is a major impediment to attainment of Universal Health Coverage [1]. Malaria is a major cause of paediatric morbidity and mortality in this part of the world [2,3]. The burden of malaria treatment on households is felt most among poor rural populations [4]. Understanding the cost drivers for the treatment of paediatric malaria is important for devising strategies for optimizing such costs. Cost modeling for malaria treatment has previously focused on adult patients and ignored indirect costs such as cost of forgone earnings and cost of transportation to and from the health facility [5]. When free treatment policy for malaria in children under the age of 5 years was enforced in Kenya in 2005, it was largely assumed that the cost of such treatment would be free. This assumption ignored indirect and intangible costs yet studies have shown that both direct and indirect costs are significantly associated with the risk of catastrophic household health expenditure [6]. It has also

1  
2  
3 been reported that, in Kenya, there are several unofficial user fees often paid by the patients  
4 despite their official scrapping for paediatrics [7]. This necessitates costing malaria treatment  
5 from a patient perspective in order to capture all costs incurred. The objective of this study was  
6 to develop a comprehensive cost model for the treatment of paediatric malaria in a resource  
7 strained setting; Homa-Bay county, Kenya.  
8  
9

## 10 **METHODS**

### 11 12 13 **Study setting**

14  
15 Kenya is classified by the World Bank as a lower middle income country [8]. The under 5  
16 mortality rate in Kenya currently stands at 45.6 per 1000 live births (9). Homa-Bay is one of the  
17 47 counties that were created in Kenya in the year 2010. It is a rural county with a predominantly  
18 peasant economy. Homa-Bay County has poverty levels above the national average and some of  
19 the poorest child health indicators in the Kenya. For example, the county specific under five  
20 mortality reported in 2016 was 130 per 1000 live births (10). The County is located in the  
21 Eastern shores of Lake Victoria hence has climatic conditions that favour malaria endemicity,  
22 with pregnant women and children bearing the greatest burden of the disease.  
23  
24  
25  
26  
27  
28  
29

### 30 **Study design**

31  
32 The study was conducted as a cross sectional survey. This design was considered appropriate  
33 since it is convenient and cost friendly to collect all the data from the patients in one encounter.  
34 Both the exposures and outcome were examined at the same time.  
35  
36  
37  
38

### 39 **Costing Approach**

40  
41 A bottom up approach of costing with a patient perspective was adopted. The total costs were  
42 summed up from individual expenditures (cost ingredients) incurred by the patient in the process  
43 of procuring care for the child with malaria. In this study, the costing was computed based on all  
44 direct and indirect monetary expenditures incurred by the parent or guardian in connection to  
45 treatment of the child.  
46  
47  
48  
49  
50

### 51 **Target population**

52  
53 The target population comprised all children below 13 years exiting government health facilities  
54 in Homa Bay County after treatment of malaria during the period of study.  
55  
56  
57  
58  
59  
60

## Sampling

The sample size was based on the findings of the Melody study [11] which reported that for cost outcomes, a sample size of approximately 200 would be required to generate a 95% CI precise to within  $\pm 10\%$  of the mean. A multistage sampling approach was adopted. First, the county was divided into eight zones based on the eight sub-counties. The health facilities were then stratified based on service provision levels from level two to level five. The County had no level one facility, three level five facilities, and no level six facility at the time of data collection. All the three level five facilities were included in the sample. Therefore, actual facility sampling was done only for levels 2, 3 and 4 facilities. A total of 13 facilities were sampled as shown in table 1. From each facility, approximately 20 patients were sampled using the purposive sampling approach where every paediatric patient exiting after treatment of malaria was approached by the research assistant for recruitment. If the target number of 20 was not reached in one day, a repeat of the process was done the following day after which no more repeats were done irrespective of the total number interviewed. This process generated a sample size of 254 participants.

**Table 1: Number of health facilities and participants sampled in the study**

| Facility level                 | 2  | 3  | 4   | 5  | Total |
|--------------------------------|----|----|-----|----|-------|
| Number of facilities           | 13 | 9  | 12  | 1  | 35    |
| Number sampled                 | 4  | 3  | 5   | 1  | 13    |
| Number of participants sampled | 68 | 54 | 100 | 32 | 254   |

## Recruitment of study participants

A research assistant approached a caregiver of a patient who had just been seen for malaria. This was followed by self introduction after which the caregiver was requested to read the consent explanation and consider consenting. If they were not able to read, it was read to them in a language that they best understood. Upon giving consent, the interview guide was administered.

## Data collection

Data on contributors to cost as well as cost of paediatric malaria was collected by use of a structured exit interview guide. Both direct costs such as out of pocket payments and cost of medicines purchased as well as indirect costs such as transport, food, waiting time and opportunity cost incurred while taking care of the sick child were measured.

## Quality assurance

Data collectors were trained for two days on the survey procedure in a classroom setting and then practised in the pre-test health facility outside the data collection area. The pre-test health facility was in Migori County which neighbours Homa-Bay County. Data collection instruments were examined by supervisors and other experts to ascertain their quality.

## Data analysis

Data was checked for completeness, cleaned, sorted and coded. This was followed by data entry into an excel spreadsheet in readiness for analysis by use of the R statistical software. Summary of descriptive data on cost of treatment was done on R software. The cost of treatment was then modelled on R statistical package using a stepwise multiple linear regression approach.

## Ethical Considerations

All principles pertaining ethical conduct of research with human subjects were adhered to in this study as embodied in the declaration of Helsinki. Ethical approval was obtained from the Kenyatta National Hospital/University of Nairobi-Ethics and Review Committee (ERC Ref-**P389/05/2016**).

## The Patient and Public Involvement statement

Patients and the public were first involved in this study at the conceptualization stage through a preliminary reconnaissance to understand the problem from a patient perspective.



1  
2  
3 Costing was done from a patient perspective thus focusing not on costs incurred by the health  
4 facilities but by the patients. The outcomes, total cost was measured by verbal autopsy from the  
5 participants  
6  
7

8  
9 Feedback from the preliminary reconnaissance was used to improve methods of data collection  
10 as well as the data collection tool.  
11  
12

13  
14 Patients were first fully informed about the process and purpose of the study and were only  
15 recruited upon informed consent  
16  
17

18 They were also informed of the time required to participate and that if they felt it was going to be  
19 too long for them, they were free to decline consent.  
20  
21

22  
23 Once the whole study process is completed, meetings will be held with the participants to discuss  
24 what may be disseminated and manner of doing the same  
25  
26  
27  
28  
29  
30

## 31 **RESULTS**

32  
33 The survey was conducted across various health facilities ranging from level 2 to level 5. Most  
34 of the participating children, 47.6% (121), were in level 4 facilities. Level 2 facilities had 26.8%  
35 (68) of the children, level 3, 21.3% (54) and level 5, 4.3% (11). Most participants, 55.5%(141),  
36 were 4-6 years old. Male participant children were 54.7% (139) while females were 45.3% (115).  
37 Most of the participants, 62.6% (159), travelled between 2 to 5 km to reach the health facility  
38 using mainly a motorcycle as the preferred means of transport 66.1% (168). After reaching the  
39 hospital, most of them, 72% (183), waited for about one hour to be served while 18.1%(46) were  
40 attended to within 30 minutes. Medical officers, 46.5% (118 ) were the majority of prescribers  
41 followed by clinical officers at 35.8% (91). Nurses prescribed to only 17.7% (45) of the  
42 respondents. Most caregiver-respondents, 70% (178), stayed in the hospital with their children  
43 for two days or less with most of them, 61.8% (157), describing the condition of their children at  
44 admission as not very sick. Most, 48 %( 122), of the participants first sought medical care in a  
45  
46  
47  
48  
49  
50  
51  
52  
53  
54  
55  
56  
57  
58  
59  
60

community pharmacy outlet before proceeding to a government hospital. Table 2 is a summary of the baseline characteristics of the study participants.

**Table 2: Sociodemographic characteristics of study participants**

| <b>Factor</b>                                      | <b>Number of children</b> | <b>%</b> |
|----------------------------------------------------|---------------------------|----------|
| <b><i>Facility Level</i></b>                       |                           |          |
| Level 2                                            | 68                        | 26.8     |
| Level 3                                            | 54                        | 21.3     |
| Level 4                                            | 121                       | 47.3     |
| Level 5                                            | 11                        | 4.4      |
| <b><i>Age of child</i></b>                         |                           |          |
| < 1                                                | 11                        | 4.3      |
| 1 – 3                                              | 74                        | 29.1     |
| 4 – 6                                              | 141                       | 55.5     |
| 7 – 9                                              | 22                        | 8.7      |
| 10 +                                               | 6                         | 2.4      |
| <b><i>Sex of child</i></b>                         |                           |          |
| Male                                               | 139                       | 54.7     |
| Female                                             | 115                       | 45.3     |
| <b><i>Distance to health facility (Km)</i></b>     |                           |          |
| < 1                                                | 40                        | 15.7     |
| 2 – 5                                              | 159                       | 62.6     |
| 5 – 10                                             | 50                        | 19.7     |
| > 10                                               | 5                         | 2.0      |
| <b><i>Mode of Transport to health facility</i></b> |                           |          |
| Ambulance                                          | 2                         | 0.8      |
| Bicycle                                            | 13                        | 5.1      |

|    |                                                |     |      |
|----|------------------------------------------------|-----|------|
| 1  |                                                |     |      |
| 2  |                                                |     |      |
| 3  | Motorcycle                                     | 168 | 66.1 |
| 4  |                                                |     |      |
| 5  | On Foot                                        | 55  | 21.7 |
| 6  |                                                |     |      |
| 7  | Private Vehicle                                | 4   | 1.6  |
| 8  |                                                |     |      |
| 9  | Public Service Vehicle                         | 12  | 4.7  |
| 10 |                                                |     |      |
| 11 | <b><i>Waiting Time</i></b>                     |     |      |
| 12 | < 30 Minutes                                   | 46  | 18.1 |
| 13 |                                                |     |      |
| 14 | 1 hr                                           | 183 | 72.0 |
| 15 |                                                |     |      |
| 16 | 2 hrs                                          | 10  | 3.9  |
| 17 |                                                |     |      |
| 18 | 3 hrs                                          | 7   | 2.8  |
| 19 |                                                |     |      |
| 20 | 3 + hrs                                        | 8   | 3.2  |
| 21 |                                                |     |      |
| 22 | <b><i>Prescriber</i></b>                       |     |      |
| 23 | Clinical Officer                               | 91  | 35.8 |
| 24 |                                                |     |      |
| 25 | Medical Officer                                | 118 | 46.5 |
| 26 |                                                |     |      |
| 27 | Nurse                                          | 45  | 17.7 |
| 28 |                                                |     |      |
| 29 | <b><i>Days of Stay at the facility</i></b>     |     |      |
| 30 | 1 – 2                                          | 178 | 70.0 |
| 31 |                                                |     |      |
| 32 | 3 – 4                                          | 38  | 15.0 |
| 33 |                                                |     |      |
| 34 | 5 – 7                                          | 38  | 15.0 |
| 35 |                                                |     |      |
| 36 | <b><i>Severity of Illness at admission</i></b> |     |      |
| 37 | Not Very Sick                                  | 157 | 61.8 |
| 38 |                                                |     |      |
| 39 | Very Sick                                      | 97  | 38.2 |
| 40 |                                                |     |      |
| 41 | <b><i>Initial treatment site</i></b>           |     |      |
| 42 |                                                |     |      |
| 43 | Community Pharmacy outlet                      | 122 | 48.0 |
| 44 |                                                |     |      |
| 45 | Dispensary                                     | 39  | 15.4 |
| 46 |                                                |     |      |
| 47 | Government Hospital                            | 36  | 14.2 |
| 48 |                                                |     |      |
| 49 | Private Hospital                               | 36  | 14.2 |
| 50 |                                                |     |      |
| 51 | Religious Leader                               | 16  | 6.3  |
| 52 |                                                |     |      |
| 53 | Retail Shop                                    | 5   | 2.0  |
| 54 |                                                |     |      |
| 55 |                                                |     |      |
| 56 |                                                |     |      |
| 57 |                                                |     |      |
| 58 |                                                |     |      |
| 59 |                                                |     |      |
| 60 |                                                |     |      |

## Modelling the cost of treating paediatric malaria

The model representing the cost of treating paediatric malaria in Homa-Bay County was developed by use of stepwise multiple linear regression analysis of the costing data collected from the exit interviews. The full model was first formulated as shown in table 3 followed by a reduced model shown in table 4.

**Table 3: Full Model of the cost of treatment of paediatric malaria**

| <b>Full model</b>           |                             |                    |                        |              |
|-----------------------------|-----------------------------|--------------------|------------------------|--------------|
| <b>Parameter</b>            | <b>Parameter Esti. (se)</b> | <b>95% CI</b>      | <b>t-Value p-Value</b> |              |
|                             |                             | LB – UB            |                        |              |
| <b>Age</b>                  | 85.9 (42.8)                 | 20.4-159.4         | 2.00                   | <b>0.047</b> |
| <b>Facility Level</b>       |                             |                    |                        |              |
| Level 3                     | 27.8 (408.9)                | -903.9 - 840.1     | 0.06                   | 0.945        |
| Level 4                     | 220.8 (352.9)               | -654.4 - 884.2     | 0.63                   | 0.533        |
| Level 5                     | 739.8 (739.4)               | -873.6 - 2,094.2   | 1.00                   | 0.319        |
| <b>Distance to Facility</b> |                             |                    |                        |              |
| 2 – 5                       | -387.5 (263.7)              | -883.1 - 225.8     | -1.5                   | 0.144        |
| 5 – 10                      | 388.9 (352.8)               | -873.6 - 593.1     | -1.1                   | 0.273        |
| 10 +                        | 414.2 (620.1)               | -1,230.5 - 1,229.6 | 0.7                    | 0.506        |
| <b>Prescriber</b>           |                             |                    |                        |              |
| Medical Officer             | 600.6 (254.9)               | 91.6 - 1,150       | 2.40                   | <b>0.021</b> |
| Nurse                       | 490.8 (298.5)               | -323.7 - 906.3     | 1.60                   | 0.104        |
| <b>Days of Stay</b>         | 210.8 (62.8)                | 86.1 - 335.4       | 0.94                   | 0.001        |
| <b>Waiting Time</b>         |                             |                    |                        |              |

|              |               |                |      |       |
|--------------|---------------|----------------|------|-------|
| Within 1 hr  | 303.2 (238.2) | -224.9 - 776.9 | 1.30 | 0.206 |
| Within 2 hrs | 395.1 (459.9) | -673 - 1,242.9 | 0.90 | 0.392 |
| Within 3 hrs | 275.1 (514.6) | -884.5 - 812.9 | 0.50 | 0.594 |

#### Initial Treatment site

|                  |               |                  |      |              |
|------------------|---------------|------------------|------|--------------|
| Dispensary       | 158.8 (404.8) | -884 .5 - 812.9  | 0.40 | 0.696        |
| Government Hosp  | 959.4 (815.5) | -595.1 - 2,612   | 1.20 | 0.242        |
| Private Hosp     | 8.9 (291.1)   | -458.7 - 685.7   | 0.03 | 0.976        |
| Religious Leader | 420.4 (302.4) | -38.8 - 1,223.4  | 1.40 | 0.168        |
| Retail Shop      | 1,440 (683.9) | 119.2 - 2,9442.7 | 2.10 | <b>0.038</b> |

**R<sup>2</sup> = 68%, R<sup>2</sup>- Adjusted= 62%.**

In the full model, variables such as age, facility level, distance to facility, prescriber, days of stay in the facility, waiting time and first point of seeking treatment were included. From this model, only the variables age, medical officer prescribing and seeking treatment first from the retail shop were significant. The unadjusted R<sup>2</sup> was 68% and the adjusted R<sup>2</sup> was 62%.

**Table 4: Reduced model for cost of treating paediatric malaria in Homa Bay County**

#### Reduced Model

| Parameter                       | Parameter Est. (se) | 95% CI          | t-Value | p-Value          |
|---------------------------------|---------------------|-----------------|---------|------------------|
| <b>Age (years)</b>              | 88.1 (43.3)         | 2.28 -173.9     | 2.03    | <b>0.044</b>     |
| <b>Facility Level</b>           |                     |                 |         |                  |
| Level 3                         | -301.5 (333.1)      | -961.5 - 358.6  | 0.06    | 0.945            |
| Level 4                         | -79.6 (265.9)       | -606.6 - 447.4  | -0.90   | 0.765            |
| Level 5                         | 1,401.8 (543.2)     | 325.2 - 2,478.3 | 2.60    | <b>0.011</b>     |
| <b>Days of Stay at facility</b> | 235.5 (56.8)        | 122.9 - 347.9   | 4.10    | <b>&lt;0.001</b> |
| <b>Prescriber</b>               |                     |                 |         |                  |
| Medical Officer                 | 746.6 (216.9)       | 316.8 - 1,176.4 | 2.40    | <b>&lt;0.001</b> |
| Nurse                           | 318.5 (56.8)        | -253.6 - 890.9  | 4.10    | 0.272            |

$R^2 = 64\%$ ,  $R^2$ - Adjusted= 62%

A stepwise multiple linear regression was then performed to select the variables that contribute most meaningfully to the model. After this stepwise process, the variables that were isolated as mostly contributing to the model were Age, Facility levels, Days of stay in the facility and Prescriber. However, the statistically significant variables were Age (t value = 2.03, p-value = 0.044), Facility level 5 (t value = 2.60, p-value = 0.011), Days of stay in the facility (t value = 4.10, p-value < 0.001) and Medical Officer as the prescriber (t value = 2.40, p-value < 0.001). For every additional year of age, the total cost increased by USD 0.88 (95% CI= 2.28, 173). Compared to level 2 facilities, the total cost of care was more expensive by USD 14 (95% CI= 325.2, 2478.3) in the level 5 facilities. For every additional day spent in the facility, the total cost of care increased by USD 2.35 (95% CI= 122.9, 347.9) shillings. Being prescribed medicines by a Clinical Officer led to the total cost being lower by USD. 7.5 (95% CI= 316.8, 1176.4) compared being prescribed to by a Medical Officer. The unadjusted  $R^2$  of the reduced model was 64% and the adjusted  $R^2$  was 62%. This means that 64% of the relationship between cost variables and total cost as captured in this model is explained by the model and not random chance. This is a significant model fit. From the variables in the reduced model, a regression equation was developed and summarized as follows;

### **The Multiple Linear Regression Equation**

The econometric cost model for treating paediatric malaria in Homa-Bay County generated from our data was represented by the generic equation given by;

$$TC = \beta_1 \text{Age} - \beta_2 \text{Level 3} - \beta_3 \text{Level 4} + \beta_4 \text{Level 5} + \beta_5 \text{Days of stay} + \beta_6 \text{MO} + \beta_7 \text{Nurse} + E$$

### **Where**

**TC** = Total Cost

**Age** = Age of the respondent

**Level 3** = treated at a level 3 health facility

1  
2  
3 **Level 4** = treated at a level 4 health facility  
4

5 **Level 5** = treated at a level 5 health facility  
6

7  
8 **Days of stay** = Number of days the respondent stays in the facility  
9

10 **MO** = Prescribed medicines by a Medical officer  
11

12 **Nurse** = Prescribed medicines by a Nurse  
13

14 **E** = Error term  
15

16  
17  
18 On substitution of the values of the coefficients, the final regression equation is  
19

20  
21 **Total Cost** = 88.1\*Age – 301.5\*Level3 -779.6\*Level 4 + 1401.8\*Level 5 + 235.5\*Days of stay  
22 + 746.6\*MO + 318.5\*Nurse + E  
23

## 24 **Discussion**

### 25 **What are our key findings?**

- 26  
27  
28  
29  
30
  - Despite waiver of user fees, indirect costs are still a significant barrier of access to paediatric malaria treatment.
  - Opportunity cost of paediatric malaria treatment is a key cost centre for paediatric malaria treatment.

31  
32  
33  
34

### 35 **What do the new findings mean?**

- 36  
37  
38
  - There need to devise policies to minimize indirect costs of paediatric malaria treatment in rural health facilities even when user fees have been waived.
  - There is need to speed up the treatment process of paediatric malaria in rural health facilities to cut on indirect costs of care.

39  
40  
41  
42  
43  
44

45 Costing was performed by the ingredient approach with the patient perspective being adopted.  
46 The patient perspective was considered the most appropriate because the survey focused on the  
47 individual patients at the point of exiting the process of care. The median total cost was 6.5  
48 dollars with a mean of 10 dollars and a range of USD 1.4 to 65. This was lower than those  
49 reported from a study in Zambia where the average cost was USD 32 for uncomplicated and  
50 USD 77 for severe complicated malaria [12] that those reported from an earlier Kenyan Study  
51 where the average cost was USD 96 [13]. Indirect costs were almost double the direct costs,  
52  
53  
54  
55  
56  
57  
58  
59  
60

1  
2  
3 indicating that indirect cost of care could be a major barrier to accessing care in this rural County  
4 even though official user fees for paediatric malaria are abolished by the government. These  
5 findings concur with those from a study in Bolivia which indicated that indirect costs still  
6 impede access to paediatric care irrespective of user fee abolition [14]. The greatest proportion of  
7 the total cost was the value of time lost in the process of seeking care. Most previous studies  
8 have not incorporated this indirect cost of time lost to care seeking in their costing models.  
9  
10 Modelling the total cost of treatment was done by multiple linear regression modelling in R  
11 software with dummy variables for age, facility level and prescriber. The variables included in  
12 the reduced model were Age, Facility levels, Days of stay in the facility and Prescriber. For  
13 every additional year of age, the total cost increased by USD 0.88 (95% CI= 0.023, 1.73). This  
14 indicated that older children bore higher costs than younger ones. Compared to level 2 facilities,  
15 the total cost of care was more expensive by USD 14 (95% CI= 325.2, 2478.3) in the level 5  
16 facility. This increased cost in higher level hospitals is in concurrence with the findings of a  
17 study in China [15]. Level 5 facilities were centrally located in the county and had health care  
18 providers with higher academic qualifications than those in lower level facilities. Before a patient  
19 is sent to such a facility, they are likely to have gone through lower level facilities. The cases  
20 referred to it are therefore more severe or need more specialized attention than those at lower  
21 level facilities. Before a patient comes to this facility, they would have spent more transport cost  
22 since it is centrally located in the County. They would also have spent more time caring for the  
23 ill child in a lower level facility prior to referral. This may explain why the cost involved is very  
24 high compared to lower level facilities. The average number of days spent in the facility was 2  
25 days. For every additional day spent in the facility, the total cost of care increased by USD 2.35  
26 (95% CI= 1.23, 3.48). The number of days spent in the facility may also have been influenced by  
27 factors such the severity of illness at admission, the time taken before seeking care, quality of  
28 care and the bed capacity of the hospital [16-18]. Being prescribed medicines by a Clinical  
29 Officer led to the total cost being lower by USD 7.5 (95% CI= 3.17, 11.76) compared being  
30 prescribed to by a Medical Officer. This may be because medical doctors tend to prescribe  
31 branded medicines more than their generic versions [19]. However, in government health  
32 facilities where patients don't pay for consultation, this observation cannot be fully explained.  
33  
34 Studies elsewhere have also reported that seeking care from medical doctors is more costly than  
35 lower cadre health care providers [20]. Medical officers were more often found in higher level  
36  
37  
38  
39  
40  
41  
42  
43  
44  
45  
46  
47  
48  
49  
50  
51  
52  
53  
54  
55  
56  
57  
58  
59  
60



1  
2  
3 facilities which are few and centrally located hence accessing them attracted more transport and  
4 hotel costs. In many cases of paediatric malaria treatment, the main cost centres are often  
5 consultation, medicines, transport and hospitalization with the most significant being the cost of  
6 medicines [21]. In the contrary, from our findings, the greatest contributor to to the total cost of  
7 care is the opportunity cost of productive time lost while caring for the sick child.  
8  
9

## 13 **Conclusions**

14  
15  
16 The Homa-Bay County Referral Hospital is much more costly than lower level health facilities  
17 indicating that the poorest who may not afford the specialized treatment in this facility may be  
18 financially barred from paediatric malaria care in the hospital. The top two drivers of cost of  
19 paediatric malaria treatment in Homa-Bay County are being admitted to the County referral  
20 hospital and a medical officer prescribing. Efforts aiming at reducing the cost of paediatric  
21 malaria treatment therefore need to focus on availing quality treatment at lower level facilities  
22 through better staffing, performance monitoring and improved infrastructure.  
23  
24  
25  
26  
27  
28

## 29 **Unanswered questions and future research**

30  
31  
32 From our findings, one of the greatest contributors to cost of treatment is being treated by a  
33 medical officer. It is not clear why this would be so especially in public health facilities where  
34 patients don't pay directly for consultation. There is therefore need for further research in other  
35 Counties and regions to attempt to validate this finding.  
36  
37  
38  
39

## 40 **Acknowledgements**

41  
42  
43 We wish to acknowledge the statistician, Dr. Alex Mwaniki for his assistance with the  
44 conceptualization of the study design and data analysis.  
45  
46

## 47 **Data Sharing**

48  
49  
50 The data used to support the findings of this study are available from the corresponding author  
51 upon request.  
52

## 53 **Competing Interests**

54  
55  
56 The authors declare that they have no competing interests.  
57  
58  
59  
60

## Author Contributions

The conceptualization and protocol development was done by all the authors. Data collection and analysis was done by MOK. MOK drafted the manuscript which was validated and corrected by JOO and BKA.

## References

1. Buigut S, Ettarh R, Amendah DD. Catastrophic health expenditure and its determinants in Kenya slum communities. *Int J Equity Health*. 2015 May 14;14:46. doi: 10.1186/s12939-015-0168-9.
2. Ayieko P, Ogero M, Makone B, Julius T, Mbevi G, Nyachiro W, Nyamai R, Were F, Githanga D, Irimu G, English M; Clinical Information Network authors. Characteristics of admissions and variations in the use of basic investigations, treatments and outcomes in Kenyan hospitals within a new Clinical Information Network. *Arch Dis Child*. 2015 Dec 10. [Epub ahead of print]
3. World Health Organization (2015). *World Malaria Report 2015*, Geneva, World Health Organization
4. Onwujekwe O, Hanson K, Uzochukwu B, Ichoku H, Ike E, Onwughalu B. Are malaria treatment expenditures catastrophic to different socio-economic and geographic groups and how do they cope with payment? A study in southeast Nigeria. *Trop Med Int Health*. 2010 Jan;15(1):18-25. doi: 10.1111/j.1365-3156.2009.02418.x. Epub 2009 Nov 3.
5. Sicuri E, Vieta A, Lindner L, Constenla D, Sauboin C. The economic costs of malaria in children in three sub-Saharan countries: Ghana, Tanzania and Kenya. *Malar J*. 2013 Sep 3; 12:307. doi: 10.1186/1475-2875-12-307.
6. Sicuri E, Davy C, Marinelli M, Oa O, Ome M, Siba P, Conteh L, Mueller I. The economic cost to households of childhood malaria in Papua New Guinea: a focus on intra-country variation. *Health Policy Plan*. 2012 Jul;27(4):339-47. doi: 10.1093/heapol/czr046. Epub 2011 Jun 22.
7. Barasa E, Ayieko P, Cleary S, English M. Out-of-pocket costs for paediatric admissions in district hospitals in Kenya. *Trop Med Int Health*. 2012 Aug;17(8):958-61. doi: 10.1111/j.1365-3156.2012.03029. x. Epub 2012 Jun 21.

1  
2  
3 **8.**<http://datatopics.worldbank.org/world-development-indicators/stories/the-classification-of-countries-by-income.html> Oct 4, 2018.

4  
5  
6 **9.** UN Inter-agency Group for Child Mortality Estimation, 2019. Kenya Country Summary, March 2017

7  
8  
9  
10 **10.** Kenya National Bureau of Statistics (KNBS). (2016). *Statistical Abstract 2015*. Nairobi: KNBS.

11  
12  
13 **11.** Johnston K, Lakzadeh P, Donato B, Szabo S. Methods of sample size calculation in descriptive retrospective burden of illness studies. *BMC Med Res Methodol*. 2019 Jan 9;19(1):9. doi: 10.1186/s12874-018-0657-9.

14  
15  
16  
17  
18  
19 **12.** Comfort B, Janneke H, Sungano M, Stillman K, Gabert R, Korde S, Nachbar N, Derriennic Y, Musau S, Hamazakaza P, Zyambo K, Zyongwe N, Hamainza B and Thuma P. Hospitalization and costs incurred at the facility level after scale-up of malaria control; Pre- Post comparisons from two hospitals in Zambia. *Am J Trop Med Hyg*. 2014 Jan. 8; 90(1): 20-32.

20  
21  
22  
23  
24  
25  
26  
27 **13.** Ayieko P, Okumu A, Griffith U and English M. The Economic burden of inpatient paediatric care in Kenya: household and provider costs for treatment of pneumonia, malaria and meningitis. *Cost Eff Resource Alloc*. 2009; 7:3

28  
29  
30  
31  
32  
33  
34 **14.** Burke RM, Rebolledo PA, Embrey SR, Wagner LD, Cowden CL, Kelly FM, Smith ER, Iñiguez V, Leon JS. The burden of pediatric diarrhea: a cross-sectional study of incurred costs and perceptions of cost among Bolivian families. *BMC Public Health*. 2013 Aug 2;13:708. doi: 10.1186/1471-2458-13-708.

35  
36  
37  
38  
39  
40  
41 **15.** Xia S, Ma J, Wang D, Li S, Rollinson D, Zhou X. Economic cost analysis of malaria case management at the household level during the malaria elimination phase in The People's Republic of China. *Infect Dis Poverty*. 2016 Jun 3;5(1):50. doi: 10.1186/s40249-016-0141-x.

42  
43  
44  
45  
46  
47  
48 **16.** Sicuri E, Davy C, Marinelli M, Oa O, Ome M, Siba P, Conteh L, Mueller I. The economic cost to households of childhood malaria in Papua New Guinea: a focus on intra-country variation. *Health Policy Plan*. 2012 Jul;27(4):339-47. doi: 10.1093/heapol/czr046. Epub 2011 Jun 22.

49  
50  
51  
52  
53  
54  
55 **17.** Kyaw SS, Drake T, Ruangveerayuth R, Chierakul W, White NJ, Newton PN, Lubell Y. Cost of treating inpatient falciparum malaria on the Thai-Myanmar border. *Malar J*. 2014 Oct 29; 13:416. doi: 10.1186/1475-2875-13-416.

1  
2  
3 **18.** Beogo, Huang N, Drabo MK, Yé Y. Malaria related care-seeking-behaviour and  
4 expenditures in urban settings: A household survey in Ouagadougou, Burkina Faso. *Acta Trop.*  
5 2016 Aug; 160:78-85. doi: 10.1016/j.actatropica.2016.03.033. Epub 2016 May 3.  
6  
7

8  
9 **19.** Adair FR, Holmgren LR. Do drug samples influence resident prescribing behavior? A  
10 randomized trial. *The American Journal of Medicine* Volume 118, Issue 8, August 2005, Pages  
11 881-88  
12

13  
14 **20.** Soremekun S, Kasteng F, Lingam R, Vassall A, Kertho E, Settumba S, Etou PL, Nanyonjo  
15 A, Ten Asbroek G, Kallander K, Kirkwood B; inSCALE Study Group. Variation in the quality  
16 and out-of-pocket cost of treatment for childhood malaria, diarrhoea, and pneumonia:  
17 Community and facility based care in rural Uganda. *PLoS One.* 2018 Nov 26;13(11):e0200543.  
18 doi: 10.1371/journal.pone.0200543. eCollection 2018.  
19  
20  
21

22  
23 **21.** Nabyonga O, Mugisha F, Okui A, Musango L, Kirigia J. Health care seeking patterns and  
24 determinants of out-of-pocket expenditure for malaria for the children under-five in Uganda.  
25 *Malar J.* 2013 May 31; 12:175. doi: 10.1186/1475-2875-12-175.  
26  
27  
28  
29  
30  
31  
32  
33  
34  
35  
36  
37  
38  
39  
40  
41  
42  
43  
44  
45  
46  
47  
48  
49  
50  
51  
52  
53  
54  
55  
56  
57  
58  
59  
60

## Appendix 9: Informed Consent explanation and Consent Form for Households

### TITLE OF THE STUDY: ECONOMIC AND HEALTH SYSTEMS DETERMINANTS OF ACCESS TO QUALITY TREATMENT OF PAEDIATRIC MALARIA IN HOMA-BAY COUNTY, KENYA.

**Institution:** University of Nairobi Institute of Tropical and Infectious Diseases

Box 30197- 00400, Nairobi.

**Investigator :** Maurice Onditi Kodhiambo

Box 11488-00400, Nairobi, Cell, **0724468162**

**Email-**makodhiambo@yahoo.com

**Supervisors:** Dr. Beatrice Amugune (Cell-07228020) and Dr. Julius Oyugi (Cell-0713898564)

**Introduction:** Permission is requested from you to enrol in this medical research study. You should understand that the general ethical principles which apply to all in medical research, whether involving well or patient volunteers will apply to this study.

**Purpose of the study:** The overall purpose of this study is to establish the economic and health systems determinants of access to quality treatment of paediatric malaria patients in Homa-Bay County. The specific purpose of this part of the study is to investigate household factors that influence access to quality treatment for paediatric malaria patients in Homa-Bay County

**What the study entails:** If you accept to take part, you will be asked some questions concerning your household and your access to quality treatment of paediatric malaria as a household. Your household has been selected because it is in the sub-location that has been selected randomly.

**Potential Risks:** No risks are expected from this study since all information you will provide will be handled confidentially and will be used for the purposes of this study only.

1  
2  
3 **Benefits:** No direct benefits will accrue to you from this study. However, it is hoped that the  
4 results of this study will be useful in improving treatment outcomes of paediatric malaria both  
5 from the policy and practice perspectives.  
6  
7

8  
9 **Voluntarism:** Your agreement to enrol in this study is entirely voluntary. You may withdraw  
10 from the study at any time without necessarily giving any reason for such withdrawal. After you  
11 read the explanation, please feel free to ask any questions that will enable you to understand  
12 clearly the nature of this study before consenting.  
13  
14  
15

16  
17 **Assurance on confidentiality:** All information you provide will be kept confidential and used  
18 for the purposes of this study only. Your name will not be used during data handling or in any  
19 resulting publications. Codes will be used instead.  
20  
21  
22

23 **Contacts:** In case you need to contact me, my supervisors or my academic department, and  
24 more importantly the ethical committee, that has approved this study, for further information  
25 concerning this study, please feel free to use the given contacts.  
26  
27  
28

### 29 **Informed Consent Form**

30  
31 **Researcher Declaration:** I hereby confirm that I have exhaustively explained the study to the  
32 participant and sought voluntary informed consent from her/him  
33  
34

35  
36 Sign.....Date.....  
37

38 **Participant declaration:** I, the undersigned, willingly agree to participate in this study, the  
39 nature and purpose of which have been fully explained to me by the investigator/translator. I  
40 understand that the information gathered will be used for the purposes of this study only and  
41 maximum confidentiality will be maintained.  
42  
43  
44

45  
46 Sign/Thumb print.....Date.....  
47  
48  
49  
50

### 51 **CONTACTS**

52  
53 **Investigator :** Maurice Onditi Kodhiambo ;  
54  
55  
56  
57  
58  
59  
60

1  
2  
3 **Cell phone-0724468162;**  
4

5  
6 **Email-makodhiambo@yahoo.com**  
7

8 **Supervisors: Dr. Beatrice Amugune (Cell-0722802074) and**  
9  
10 **Dr. Julius Oyugi (Cell-0713898564).**  
11

12  
13 **Secretary, KNH/UoN ERC (Prof. Chindia) - P. O. Box 19676-00202, Nairobi, Tel. (254-020)**  
14  
15 **2726300-9 Ext 44102: E-mail: uonknh\_erc@uonbi.ac.ke**  
16

17  
18  
19  
20  
21  
22  
23  
24  
25  
26  
27  
28  
29  
30  
31  
32  
33  
34  
35  
36  
37  
38  
39  
40  
41  
42  
43  
44  
45  
46  
47  
48  
49  
50  
51  
52  
53  
54  
55  
56  
57  
58  
59  
60

For peer review only

|                           | <b>Item No</b> | <b>Recommendation</b>                                                                                                                                                                             | <b>Page No</b>             |
|---------------------------|----------------|---------------------------------------------------------------------------------------------------------------------------------------------------------------------------------------------------|----------------------------|
| <b>Title and abstract</b> | 1              | (a) Indicate the study's design with a commonly used term in the title or the abstract                                                                                                            | 1                          |
|                           |                | (b) Provide in the abstract an informative and balanced summary of what was done and what was found                                                                                               | 1                          |
| <b>Introduction</b>       |                |                                                                                                                                                                                                   |                            |
| Background/rationale      | 2              | Explain the scientific background and rationale for the investigation being reported                                                                                                              | 1                          |
| Objectives                | 3              | State specific objectives, including any prespecified hypotheses                                                                                                                                  | 2                          |
| <b>Methods</b>            |                |                                                                                                                                                                                                   |                            |
| Study design              | 4              | Present key elements of study design early in the paper                                                                                                                                           | 3                          |
| Setting                   | 5              | Describe the setting, locations, and relevant dates, including periods of recruitment, exposure, follow-up, and data collection                                                                   | 3                          |
| Participants              | 6              | (a) Give the eligibility criteria, and the sources and methods of selection of participants                                                                                                       | 5                          |
| Variables                 | 7              | Clearly define all outcomes, exposures, predictors, potential confounders, and effect modifiers. Give diagnostic criteria, if applicable                                                          | 5                          |
| Data sources/measurement  | 8*             | For each variable of interest, give sources of data and details of methods of assessment (measurement). Describe comparability of assessment methods if there is more than one group              | 5                          |
| Bias                      | 9              | Describe any efforts to address potential sources of bias                                                                                                                                         |                            |
| Study size                | 10             | Explain how the study size was arrived at                                                                                                                                                         |                            |
| Quantitative variables    | 11             | Explain how quantitative variables were handled in the analyses. If applicable, describe which groupings were chosen and why                                                                      |                            |
| Statistical methods       | 12             | (a) Describe all statistical methods, including those used to control for confounding                                                                                                             | 6                          |
|                           |                | (b) Describe any methods used to examine subgroups and interactions                                                                                                                               |                            |
|                           |                | (c) Explain how missing data were addressed                                                                                                                                                       | There were no missing data |
|                           |                | (d) If applicable, describe analytical methods taking account of sampling strategy                                                                                                                | 4                          |
|                           |                | (e) Describe any sensitivity analyses                                                                                                                                                             |                            |
| <b>Results</b>            |                |                                                                                                                                                                                                   |                            |
| Participants              | 13*            | (a) Report numbers of individuals at each stage of study—eg numbers potentially eligible, examined for eligibility, confirmed eligible, included in the study, completing follow-up, and analysed | 7                          |
|                           |                | (b) Give reasons for non-participation at each stage                                                                                                                                              | 7                          |



|                          |     |                                                                                                                                                                                                              |      |
|--------------------------|-----|--------------------------------------------------------------------------------------------------------------------------------------------------------------------------------------------------------------|------|
|                          |     | (c) Consider use of a flow diagram                                                                                                                                                                           |      |
| Descriptive data         | 14* | (a) Give characteristics of study participants (eg demographic, clinical, social) and information on exposures and potential confounders                                                                     | 7-9  |
|                          |     | (b) Indicate number of participants with missing data for each variable of interest                                                                                                                          |      |
| Outcome data             | 15* | Report numbers of outcome events or summary measures                                                                                                                                                         |      |
| Main results             | 16  | (a) Give unadjusted estimates and, if applicable, confounder-adjusted estimates and their precision (eg, 95% confidence interval). Make clear which confounders were adjusted for and why they were included | 9-11 |
|                          |     | (b) Report category boundaries when continuous variables were categorized                                                                                                                                    |      |
|                          |     | (c) If relevant, consider translating estimates of relative risk into absolute risk for a meaningful time period                                                                                             |      |
| Other analyses           | 17  | Report other analyses done—eg analyses of subgroups and interactions, and sensitivity analyses                                                                                                               |      |
| <b>Discussion</b>        |     |                                                                                                                                                                                                              |      |
| Key results              | 18  | Summarise key results with reference to study objectives                                                                                                                                                     | 12   |
| Limitations              | 19  | Discuss limitations of the study, taking into account sources of potential bias or imprecision. Discuss both direction and magnitude of any potential bias                                                   | 14   |
| Interpretation           | 20  | Give a cautious overall interpretation of results considering objectives, limitations, multiplicity of analyses, results from similar studies, and other relevant evidence                                   | 12   |
| Generalisability         | 21  | Discuss the generalisability (external validity) of the study results                                                                                                                                        | 14   |
| <b>Other information</b> |     |                                                                                                                                                                                                              |      |
| Funding                  | 22  | Give the source of funding and the role of the funders for the present study and, if applicable, for the original study on which the present article is based                                                | 15   |

# BMJ Open

## Modeling the Household cost of Paediatric Malaria Treatment in a Rural County in Kenya; Do non-user fee payments matter? A partial cost of illness analysis

|                                 |                                                                                                                                                                                       |
|---------------------------------|---------------------------------------------------------------------------------------------------------------------------------------------------------------------------------------|
| Journal:                        | <i>BMJ Open</i>                                                                                                                                                                       |
| Manuscript ID                   | bmjopen-2019-033192.R1                                                                                                                                                                |
| Article Type:                   | Research                                                                                                                                                                              |
| Date Submitted by the Author:   | 27-Dec-2019                                                                                                                                                                           |
| Complete List of Authors:       | Kodhiambo, Maurice; Kenyatta University, Pharmacy<br>Oyugi, Julius; University of Nairobi, Medical Microbiology<br>Amugune, Beatrice; University of Nairobi, Pharmaceutical Chemistry |
| <b>Primary Subject Heading</b>: | Health economics                                                                                                                                                                      |
| Secondary Subject Heading:      | Health policy, Health services research                                                                                                                                               |
| Keywords:                       | Community child health < PAEDIATRICS, HEALTH ECONOMICS, Health policy < HEALTH SERVICES ADMINISTRATION & MANAGEMENT                                                                   |
|                                 |                                                                                                                                                                                       |

SCHOLARONE™  
Manuscripts



I, the Submitting Author has the right to grant and does grant on behalf of all authors of the Work (as defined in the below author licence), an exclusive licence and/or a non-exclusive licence for contributions from authors who are: i) UK Crown employees; ii) where BMJ has agreed a CC-BY licence shall apply, and/or iii) in accordance with the terms applicable for US Federal Government officers or employees acting as part of their official duties; on a worldwide, perpetual, irrevocable, royalty-free basis to BMJ Publishing Group Ltd ("BMJ") its licensees and where the relevant Journal is co-owned by BMJ to the co-owners of the Journal, to publish the Work in this journal and any other BMJ products and to exploit all rights, as set out in our [licence](#).

The Submitting Author accepts and understands that any supply made under these terms is made by BMJ to the Submitting Author unless you are acting as an employee on behalf of your employer or a postgraduate student of an affiliated institution which is paying any applicable article publishing charge ("APC") for Open Access articles. Where the Submitting Author wishes to make the Work available on an Open Access basis (and intends to pay the relevant APC), the terms of reuse of such Open Access shall be governed by a Creative Commons licence – details of these licences and which [Creative Commons](#) licence will apply to this Work are set out in our licence referred to above.

Other than as permitted in any relevant BMJ Author's Self Archiving Policies, I confirm this Work has not been accepted for publication elsewhere, is not being considered for publication elsewhere and does not duplicate material already published. I confirm all authors consent to publication of this Work and authorise the granting of this licence.

## Modeling the Household cost of Paediatric Malaria Treatment in a Rural County in Kenya; Do non-user fee payments matter? A partial cost of illness analysis

**Kodhiambo, Maurice Onditi <sup>1</sup>, Oyugi, Julius Otieno <sup>2</sup> and Amugune, Beatrice Kagai <sup>3</sup>**

1. School of Pharmacy, Kenyatta University, P.O. Box 43844-00100, Nairobi, Kenya., Cell Phone-+254724468162, Email: kodhiambo.maurice@ku.ac.ke **Corresponding Author**

2. Department of Medical Microbiology, University of Nairobi, Nairobi, Kenya.

Email:julias.oyugi9@gmail.com

3. Department of Pharmaceutical Chemistry, University of Nairobi, Nairobi, Kenya. Email

[beatrice.amugune@uonbi.ac.ke](mailto:beatrice.amugune@uonbi.ac.ke)

### ABSTRACT

**Objective:** The objective of this study was to develop an econometric model for the cost of treatment of paediatric malaria from a patient perspective in a resource scarce rural setting of Homa-Bay County, Kenya. We sought to investigate the main contributors and the contribution of non-user fee payments to the total household cost of care. Costs were measured from a patient perspective.

**Design:** A health facility based cross sectional survey targeting paediatric patients.

**Setting:** The study was conducted in 13 health facilities ranging from level II to level V in Homa Bay County which is in the Eastern shores of Lake Victoria, Kenya. This is in a malaria area ...

**Participants:** The study enrolled 254 inpatient children (139 males and 115 females) all of who participated up to the end of this study.

**Primary outcome measure:** The primary outcome measure was the cost of care for pediatric malaria borne by the patient. This was measured by asking caregivers to estimate the cost of various items forming their total expenditure on care seeking from an exit interview.

**Results:** A total of 254 respondents who consented from 13 public government health facilities were interviewed. Age, number of days spent at the health facility, being treated at a level V facility, medical officer prescribing and seeking initial treatment from a retail shop were found significant predictors of cost.

**Conclusion** Higher level health facilities in Homa-Bay County, where the more specialized medical workers are stationed, are more costly hence barring the poorest from obtaining quality paediatric malaria care from here. . Waiving user fees alone may not be sufficient to guarantee access to care by patients due to unofficial fees and non user fees expenditures..

**Keywords:** Modeling, Household Cost of treatment, Paediatric malaria, Homa-Bay County

### Strengths and limitations of this study

#### Strengths

1  
2  
3 This study was conducted only four years after implementation of a devolved health care system  
4 in Kenya. This study is therefore part of an early attempt to evaluate the health systems  
5 performance post devolution. This gives it novelty.  
6  
7

8 Many previous malaria costing studies have focused on either direct costs only or costs by adult  
9 patients only. This study includes both direct and indirect costs from a patient perspective  
10 including opportunity cost of time lost for caring for the patient.  
11  
12

13 Robust statistical analysis using stepwise regression analysis was thereby chosen to take care of  
14 any possible confounders to the study findings.  
15  
16  
17

### 18 **Limitations**

19 The data was collected solely through exit interviews for caregivers. This may weaken validity  
20 of the findings as some respondents may have been fatigued by the stay in the hospital.  
21  
22

23 The study was conducted in one county and the findings may therefore not be generalizable to all  
24 counties in Kenya due to geographic and socioeconomic variation across the board.  
25  
26

### 27 **INTRODUCTION**

28  
29 Cost of health care services in sub-Saharan Africa is a major impediment to attainment of  
30 Universal Health Coverage [1]. Malaria is a major cause of paediatric morbidity and mortality in  
31 this part of the world [2,3]. The burden of malaria treatment on households is felt most among  
32 poor rural populations [4]. Understanding the cost drivers for the treatment of paediatric malaria  
33 is important for devising strategies for optimizing such costs. Few cost modeling studies for  
34 malaria treatment from a patient perspective have been specifically focused on children in  
35 resource scarce settings as is the case in this study. Most models have not included costs  
36 ingredients such as forgone earnings and cost of transportation to and from the health facility [5].  
37 When free treatment policy for malaria in children under the age of 5 years was enforced in  
38 Kenya in 2005, it was expected that such a shift would improve financial access to treatment to  
39 the most needy of patients. This assumption however did not include non-user fee payments and  
40 other intangible costs that other studies have shown to be significantly associated with the risk of  
41 catastrophic household health expenditure [6]. There have however been reports of several  
42 unofficial user fees being charged for paediatric malaria treatment despite their official abolition  
43 [7]. This necessitates costing malaria treatment from a patient perspective in order to capture all  
44  
45  
46  
47  
48  
49  
50  
51  
52  
53  
54  
55

1  
2  
3 costs incurred by the patient in the process of care seeking. The objective of this study was to  
4 develop a cost model for the treatment of paediatric malaria from a patient perspective in the  
5 resource scarce setting of Homa-Bay County, Kenya.  
6  
7  
8  
9

## 10 **METHODS**

### 11 **Study setting**

12 Kenya is classified by the World Bank as a lower middle income country [8] with the under-five  
13 mortality rate at 45.6 per 1000 live births (9). Homa-Bay is a rural county with a predominantly  
14 peasant economy with poverty levels above the national average and some of the poorest child  
15 health indicators in the Kenya. In 2016, the under-five mortality was 130 per 1000 live births  
16 (10). The Kenya Demographic and Health Survey (KDHS) 2014 also indicates that most  
17 residents of Homa-Bay County lie in the lowest wealth quintile with an unfavourable Gini  
18 coefficient. These are economic indicators that may demonstrate that the average income of the  
19 residents is low. The County is located in the Eastern shores of Lake Victoria hence has climatic  
20 conditions that favour malaria endemicity, with pregnant women and children bearing the  
21 greatest burden of the disease. The prevalence of malaria in Homa bay as of 2016 was 58,820 per  
22 100000 persons, which is more than double the national prevalence of 20,252 per 100,000  
23 persons (10). Malaria incidence usually peaks in Kenya around September to October rainy  
24 season which coincides with the time the study was conducted.  
25  
26  
27  
28  
29  
30  
31  
32  
33  
34  
35  
36  
37

### 38 **Study design**

39 The study was conducted as a cross sectional survey. This design was considered appropriate  
40 since it is strategic and affordable to collect all the data from the patients in one encounter at the  
41 end of the treatment process. Both the exposures and outcome were examined at the same time.  
42  
43  
44  
45

### 46 **Costing Approach**

47 Costing was conducted from a patient perspective. The total costs were summed up from  
48 component expenditures per category reported to be incurred by the patient in the process of  
49 procuring care for the child with malaria. In this study, the costing was computed to include all  
50  
51  
52  
53  
54  
55

1  
2  
3 user fees and non-user fee monetary expenditures incurred by the caregiver in the process of  
4 seeking care for the sick child.  
5  
6  
7

### 8 **Target population**

9  
10 The target population comprised all children below 13 years exiting government health facilities  
11 in Homa Bay County after treatment of for malaria during the period of study. Children below  
12 the age of 13 years were targeted because they tend to depend wholly on parental or guardian  
13 decisions as they are not yet financially or socially independent.  
14  
15

### 16 **Sampling**

17  
18 The sample size was based on the Melody study [11] which recommends that for cost outcomes,  
19 a sample size of approximately 200 would be required to generate a 95% CI precise to within  
20  $\pm 10\%$  of the mean. A multistage sampling approach was adopted. First, the county was divided  
21 into eight zones based on the eight sub-counties. The health facilities were then stratified based  
22 on service provision levels (level II to level V, Table 1). The County had no level I and V facility  
23 and only one level V facility at the time of data collection. The level five facility was purposively  
24 included in the sample. Therefore, actual facility sampling was done only for levels II, III, IV  
25 and V facilities. A total of 13 facilities were sampled as shown in Table 2. From each facility,  
26 approximately 20 in-patients were sampled using the systematic random sampling approach  
27 where every other paediatric patient exiting after treatment for malaria was approached by the  
28 research assistant for recruitment. This process was repeated on daily basis until the targeted  
29 sample size of 254 participants was met.  
30  
31  
32  
33  
34  
35  
36  
37  
38  
39  
40

41 Table 1: Classification of Health facilities based on service level

| 42 <b>Facility level</b> | 43 <b>Basis</b>                  | 44 <b>Services offered include</b>                                                                                                                |
|--------------------------|----------------------------------|---------------------------------------------------------------------------------------------------------------------------------------------------|
| 45 <b>Level I</b>        | 46 Community                     | 47 A range of preventive and curative services with a focus on primary care services.                                                             |
| 48 <b>Level II</b>       | 49 Dispensaries                  | 50 Management of common illnesses in the specific region                                                                                          |
| 51 <b>Level III</b>      | 52 Health centers                | 53 Formal immunization programs, HIV testing and referral                                                                                         |
| 54 <b>Level IV</b>       | 55 District referral hospitals   | 56 Antenatal care (ANC) and routine birthing services, HIV/AIDS care (96%), paediatric services (93%), and emergency obstetric care (EmOC) (78%). |
| 57 <b>Level V</b>        | 58 Provincial referral hospitals | 59 Surgical services, internal medicine, and specialty                                                                                            |

|                 |                             |                                                                                                                                                                                                        |
|-----------------|-----------------------------|--------------------------------------------------------------------------------------------------------------------------------------------------------------------------------------------------------|
| <b>Level VI</b> | National referral hospitals | services such as emergency EmOC and anesthesiology but less extensive as the National Referral Hospitals. Surgical services, internal medicine, and specialty services such as EmOC and anesthesiology |
|-----------------|-----------------------------|--------------------------------------------------------------------------------------------------------------------------------------------------------------------------------------------------------|

**Source:** Ministry of Health, 2017: The Health care system in Kenya and Kenyan healthcare sector: market study report

**Table 2: Number of health facilities and participants sampled in the study**

| Facility level                       | II | III | IV  | V  | Total      |
|--------------------------------------|----|-----|-----|----|------------|
| <b>Number of facilities</b>          | 13 | 9   | 12  | 1  | <b>35</b>  |
| <b>Number of facilities sampled</b>  | 4  | 3   | 5   | 1  | <b>13</b>  |
| <b>Number of in-patients sampled</b> | 68 | 54  | 100 | 32 | <b>254</b> |

### Recruitment of study participants

A research assistant approached a caregiver of an in-patient who had just been treated for malaria at the time of exit. This was followed by self introduction after which the caregiver was requested to read the consent explanation (in a language they best understood- English, Swahili or Luo) and consider consenting.

### Data collection

Data on contributors to cost as well as cost of paediatric malaria was collected from August 2016 to November 2016 by use of a structured exit interview guide on consented participants. This period was selected because malaria infections in the region usually peak during rainy seasons of September to October. Both direct costs such as out of pocket payments and cost of medicines purchased as well as indirect costs such as transport, food, waiting time and opportunity cost incurred while taking care of the sick child were measured in Kenya shillings but reported in USD ( 100 Kshs= 1 USD) .

The interviewers were trained to probe opportunity cost borne by caregivers in the process of seeking health care for the sick child by asking them to state their occupation. From this, the



1  
2  
3 approximate forgone benefit was estimated to triangulate the information gathered from their  
4 response to the direct questions posed to the caregiver about their estimated opportunity cost.  
5

### 6 **Quality assurance**

7  
8 Data collectors were trained for two days on the survey tool as well as the procedure in a  
9 classroom setting and then practised in the pre-test health facility outside the data collection area  
10 (Migori County). Data collection instruments were examined by supervisors and other experts to  
11 ascertain their quality and validity.  
12  
13  
14  
15

### 16 **Data analysis**

17  
18 Data was checked for completeness, cleaned, sorted and coded. This was followed by data entry  
19 into excel (2016) spreadsheet in readiness for analysis by use of the R statistical software to  
20 compute descriptive statistics on cost of treatment. The cost of treatment was then further  
21 modeled on R (Studio) statistical package using a stepwise multiple linear regression approach.  
22  
23  
24  
25  
26

### 27 **Ethical Considerations**

28  
29 All principles pertaining ethical conduct of research with human subjects were adhered to in this  
30 study as embodied in the Declaration of Helsinki. Ethical approval was obtained from the  
31 Kenyatta National Hospital/University of Nairobi-Ethics and Review Committee (KNH-UON  
32 ERC Ref-P389/05/2016).  
33  
34  
35  
36  
37

### 38 **Patient and Public Involvement**

39  
40 Given that was no funding for this study, there were no funds or time allocated for patient or  
41 public involvement so we were unable to involve patients. However, we plan to invite  
42 representatives of the public to help us write a plain language summary for further dissemination  
43 of the results.  
44  
45  
46  
47

## 48 **RESULTS**

49  
50 The survey was conducted across various health facilities ranging from level II to level V. Most  
51 of the participating children, 47.6% (121), had been treated in level IV facilities. Level II  
52 facilities had 26.8% (68) of the children, level III, 21.3% (54) and level V, 4.3% (11). Most  
53  
54  
55

participants, 55.5% (141), were 4-6 years old. Male children were 54.7% (139) while females were 45.3% (115). Most of the participants, 62.6% (159), travelled for 2 to 5 km to reach the health facility using mainly a motorcycle as the preferred means of transport 66.1% (168). After reaching the hospital, most of them, 72% (183), waited for about one hour to be served while 18.1%(46) were attended to within 30 minutes. Medical officers, 46.5% (118) were the most common prescribers followed by clinical officers at 35.8% (91). Nurses prescribed for 17.7% (45) of the respondents. Most caregiver-respondents, 70% (178), stayed in the hospital with their children for two days or less with most of them, 61.8% (157), describing the condition of their children at admission as not very sick. Most of the participants 48 %( 122) first sought medical care in a community pharmacy outlet before proceeding to a government health facility. Table 3 is a summary of the baseline characteristics of the study participants.

**Table 3: Sociodemographic characteristics of study participants**

| <b>Factor</b>                                  | <b>Number of children</b> | <b>%</b> |
|------------------------------------------------|---------------------------|----------|
| <b><i>Facility Level</i></b>                   |                           |          |
| Level I                                        | 68                        | 26.8     |
| Level III                                      | 54                        | 21.3     |
| Level IV                                       | 121                       | 47.3     |
| Level V                                        | 11                        | 4.4      |
| <b><i>Age of child</i></b>                     |                           |          |
| < 1                                            | 11                        | 4.3      |
| 1 – 3                                          | 74                        | 29.1     |
| 4 – 6                                          | 141                       | 55.5     |
| 7 – 9                                          | 22                        | 8.7      |
| 10 +                                           | 6                         | 2.4      |
| <b><i>Sex of child</i></b>                     |                           |          |
| Male                                           | 139                       | 54.7     |
| Female                                         | 115                       | 45.3     |
| <b><i>Distance to health facility (Km)</i></b> |                           |          |
| < 1                                            | 40                        | 15.7     |
| 2 – 5                                          | 159                       | 62.6     |

|    |                                                                   |     |      |
|----|-------------------------------------------------------------------|-----|------|
| 1  |                                                                   |     |      |
| 2  |                                                                   |     |      |
| 3  | 5 – 10                                                            | 50  | 19.7 |
| 4  | > 10                                                              | 5   | 2.0  |
| 5  | <b><i>Mode of Transport to health facility</i></b>                |     |      |
| 6  |                                                                   |     |      |
| 7  | Ambulance                                                         | 2   | 0.8  |
| 8  | Bicycle                                                           | 13  | 5.1  |
| 9  | Motorcycle                                                        | 168 | 66.1 |
| 10 | On Foot                                                           | 55  | 21.7 |
| 11 | Private Vehicle                                                   | 4   | 1.6  |
| 12 | Public Service Vehicle                                            | 12  | 4.7  |
| 13 | <b><i>Waiting Time before initial treatment</i></b>               |     |      |
| 14 |                                                                   |     |      |
| 15 |                                                                   |     |      |
| 16 | < 30 Minutes                                                      | 46  | 18.1 |
| 17 | 1 hr                                                              | 183 | 72.0 |
| 18 | 2 hrs                                                             | 10  | 3.9  |
| 19 | 3 hrs                                                             | 7   | 2.8  |
| 20 | 3 + hrs                                                           | 8   | 3.2  |
| 21 | <b><i>Prescriber</i></b>                                          |     |      |
| 22 |                                                                   |     |      |
| 23 | Clinical Officer                                                  | 91  | 35.8 |
| 24 | Medical Officer                                                   | 118 | 46.5 |
| 25 | Nurse                                                             | 45  | 17.7 |
| 26 | <b><i>Days of Stay at the facility</i></b>                        |     |      |
| 27 |                                                                   |     |      |
| 28 | 1 – 2                                                             | 178 | 70.0 |
| 29 | 3 – 4                                                             | 38  | 15.0 |
| 30 | 5 – 7                                                             | 38  | 15.0 |
| 31 | <b><i>Caregiver reported severity of Illness at admission</i></b> |     |      |
| 32 |                                                                   |     |      |
| 33 | Not Very Sick                                                     | 157 | 61.8 |
| 34 | Very Sick                                                         | 97  | 38.2 |
| 35 | <b><i>Initial treatment site</i></b>                              |     |      |
| 36 |                                                                   |     |      |
| 37 | Community Pharmacy outlet                                         | 122 | 48.0 |
| 38 | Dispensary (Level II)                                             | 39  | 15.4 |
| 39 | Government Hospital                                               | 36  | 14.2 |
| 40 | Private Hospital                                                  | 36  | 14.2 |
| 41 | Religious Leader                                                  | 16  | 6.3  |
| 42 | Retail Shop                                                       | 5   | 2.0  |
| 43 |                                                                   |     |      |
| 44 |                                                                   |     |      |
| 45 |                                                                   |     |      |

### Cost drivers for the treatment of paediatric malaria in Homa-Bay County

The individual patient reported costs per category were analyzed and summarized as in Table 4.

**Table 4: Patient reported costs of treating paediatric malaria in Homa-Bay County**

|  | Cost of Treatment(USD) |
|--|------------------------|
|--|------------------------|

|                                     | Mean | Median | Minimum | Maximum |
|-------------------------------------|------|--------|---------|---------|
| Transport                           | 0.81 | 0.50   | 0       | 20      |
| Food                                | 2.29 | 2.00   | 0.20    | 18      |
| Value of time used for seeking care | 5.56 | 3.25   | 1       | 50      |
| Direct Payment                      | 1.38 | 12     | 0       | 50      |

### Modeling the cost of treating paediatric malaria

The model representing the cost of treating paediatric malaria in Homa-Bay County was developed by use of stepwise multiple linear regression analysis of the costing data collected from the exit interviews. The full model was first formulated as shown in Table 5 followed by a reduced model **after Bootstrapping regression** shown in Table 6.

**Table 5: Full Model of the cost of treatment of paediatric malaria**

#### Full model

#### Full model

| Parameter                   | Parameter Esti. (se) | 95% CI         | t-Value | p-Value      |
|-----------------------------|----------------------|----------------|---------|--------------|
|                             |                      | LB – UB        |         |              |
| Age                         | 0,85 (0.42)          | 0.20-1.59      | 2.00    | <b>0.047</b> |
| <b>Facility Level</b>       |                      |                |         |              |
| Level II                    | 1                    |                |         |              |
| Level III                   | 0.27 (4.08)          | -9.04– 8.40    | 0.06    | 0.945        |
| Level IV                    | 2.20 (3.52)          | -6.54– 8.84    | 0.63    | 0.533        |
| Level V                     | 7.39 (7.39)          | -8.74 - 20.94  | 1.00    | 0.319        |
| <b>Distance to Facility</b> |                      |                |         |              |
| 1 – 2 days                  | 1                    |                |         |              |
| 3 – 5                       | -3.87 (2.64)         | -8.83– 2.26    | -1.5    | 0.144        |
| 6 – 10                      | 3.89 (3.53)          | -8.74 – 5.93   | -1.1    | 0.273        |
| 10 +                        | 4.14 (6.20)          | -12.31 - 12.30 | 0.7     | 0.506        |
| <b>Prescriber</b>           |                      |                |         |              |
| Clinical Officer            | 1                    |                |         |              |
| Medical Officer             | 6.01(2.55)           | 0.92 - 11.50   | 2.40    | <b>0.021</b> |
| Nurse                       | 4.91(2.99)           | -32.37 – 9.06  | 1.60    | 0.104        |
| <b>Days of Stay</b>         | 2.11 (0.63)          | 0.86 – 3.35    | 0.94    | <b>0.001</b> |
| <b>Waiting Time</b>         |                      |                |         |              |

|                               |              |               |      |              |  |
|-------------------------------|--------------|---------------|------|--------------|--|
| <30 minutes                   | 1            |               |      |              |  |
| Within 1 hr                   | 3.03 (2.38)  | -2.25 – 7.77  | 1.30 | 0.206        |  |
| Within 2 hrs                  | 3.95 (4.60)  | -6.73 - 12.43 | 0.90 | 0.392        |  |
| Within 3 hrs                  | 2.75 (5.15)  | -8.85 – 8.13  | 0.50 | 0.594        |  |
| <b>Initial Treatment site</b> |              |               |      |              |  |
| Community                     |              |               |      |              |  |
| Pharmacy outlet               | 1            |               |      |              |  |
| Dispensary                    | 1.59(4.05)   | -8.85 – 8.13  | 0.40 | 0.696        |  |
| Government Hosp               | 9.59 (8.15)  | -5.95 - 26.12 | 1.20 | 0.242        |  |
| Private Hosp                  | 0.09 (2.91)  | -4.59 – 6.86  | 0.03 | 0.976        |  |
| Religious Leader              | 4.20 (3.02)  | -0.39 - 12.23 | 1.40 | 0.168        |  |
| Retail Shop                   | 14.40 (6.84) | 1.19 - 29.43  | 2.10 | <b>0.038</b> |  |

**R<sup>2</sup> = 68%, R<sup>2</sup>- Adjusted= 62%.**

**Table 6: Reduced model for cost of treating paediatric malaria in Homa Bay County**

| <b>Reduced Model – After Bootstrapping Regression</b> |                            |               |                |                  |
|-------------------------------------------------------|----------------------------|---------------|----------------|------------------|
| <b>Parameter</b>                                      | <b>Parameter Est. (se)</b> | <b>95% CI</b> | <b>t-Value</b> | <b>p-Value</b>   |
| <b>Age (years)</b>                                    | 0.83 (0.45)                | -0.05-1.71    | 1.8            | 0.066            |
| <b>Facility Level</b>                                 |                            |               |                |                  |
| Level II                                              | 1                          |               |                |                  |
| Level III                                             | 3.36 (3.19)                | -2.97-9.69    | 1.1            | 0.294            |
| Level IV                                              | 5.87 (2.61)                | 0.70-11.04    | 2.3            | <b>0.026</b>     |
| Level V                                               | 20.64 (5.13)               | 10.49-30.83   | 4.0            | <b>&lt;0.001</b> |
| <b>Days of Stay at facility</b>                       | 2.38 (0.58)                | 1.23- 3.53    | 4.1            | <b>&lt;0.001</b> |
| <b>Prescriber</b>                                     |                            |               |                |                  |
| Clinical Officer                                      | 1                          |               |                |                  |
| Medical Officer                                       | 6.98 (4.29)                | -1.51-15.47   | 2.40           | 0.106            |
| Nurse                                                 | 2.73 (4.63)                | 6.44-11.90    | 0.59           | 0.556            |

**R<sup>2</sup> = 38%, R<sup>2</sup>- Adjusted= 33%**

A stepwise multiple linear regression was then performed to select the variables that contribute most meaningfully to the model. After this stepwise process, the variables that were isolated as mostly contributing to the model were age, facility levels, days of stay in the facility and prescriber. However, the statistically significant variables were days of stay in the facility (t value = 4.10, p-value < 0.001) and Level IV & V (t value = 2.3, p-value < 0.05).

From the obtained model, for every additional year of age, the total cost increased by USD 0.82 (95% CI= -0.05 – 1.71). Compared to level II facilities, the total cost of care was more expensive by USD 14 (95% CI= 3.25, 24.78) in the level V facilities. For every additional day spent in the facility, the total cost of care increased by USD 2.35 (95% CI= 1.23, 3.48) shillings. Being prescribed medicines by a Clinical Officer led to the total cost being lower by USD. 7.5 (95% CI= 3.17, 11.76) compared to prescription by a Medical Officer. The unadjusted coefficient of determination,  $R^2$ , of the reduced model was 38% and the adjusted  $R^2$  was 33%. This means that 33% of the relationship between cost variables and total cost as captured in this model is explained by the model and not random chance. This model thus explains 33% of the variation in costs. From the variables in the reduced model, a regression equation was developed and summarized as follows;

### **The Multiple Linear Regression Equation**

The econometric cost model for treating paediatric malaria in Homa-Bay County generated from our data was represented by the generic equation given by;

$$TC = \beta_1 \text{ Age} - \beta_2 \text{ Level 3} - \beta_3 \text{ Level 4} + \beta_4 \text{ Level 5} + \beta_5 \text{ Days of stay} + \beta_6 \text{ MO} + \beta_7 \text{ Nurse} + \epsilon$$

#### **Where**

**TC** = Total Cost

**Level 3** = treated at a level 3 health facility

**Level 4** = treated at a level 4 health facility

**Level 5** = treated at a level 5 health facility

**Days of stay** = Number of days the respondent stays in the facility

**€** = Error term

On substitution of the values of the coefficients, the final regression equation is

$$\text{Total Household Cost} = 3.36 * \text{Level III} + 5.87 * \text{Level IV} + 20.63 * \text{Level V} + 23.83 * \text{Days of stay} + 6.98 * \text{Medical Officer} + 2.73 * \text{Nurse} + \epsilon$$

### **Discussion**

Costing was performed from a patient perspective. The patient perspective was considered the most appropriate because the survey focused on the individual patients at the point of exiting the process of care. The median total cost (USD) was 6.5 with a mean of 10 and a range of 1.4 to 65. This was lower than those reported from a study in Zambia where the average cost was 32

1  
2  
3 for uncomplicated and USD 77 for severe complicated malaria [12] and from an earlier Kenyan  
4 Study with an average cost of USD 96 [13].  
5  
6  
7

8 Non-user fees such as cost of transportation and food were almost double the user fees,  
9 indicating that such costs of care could be a major barrier to accessing care in this rural County  
10 even though official user fees for paediatric malaria are abolished by the government. It also  
11 shows that some facilities still charge unofficial user fees thus increasing the barrier to access.  
12 These findings concur with those from a study in Bolivia which indicated that indirect costs still  
13 impede access to paediatric care irrespective of user fee abolition [14].  
14  
15  
16  
17  
18  
19

20 One of the main contributors to total household costs was the value of time lost in the process of  
21 seeking care. Most previous studies have not incorporated the cost of time lost due to care  
22 seeking in their costing models.  
23  
24

25 Compared to level II facilities, the total cost of care was more expensive by USD 14 (95% CI=  
26 3.25, 24.78) in the level V facility. This increased total cost in higher level hospitals is in  
27 concurrence with the findings of a study in China [15]. Level V facility was centrally located in  
28 the county and had health care providers with higher academic qualifications than those in lower  
29 level facilities. Before a patient is sent to such a facility, they are likely to have gone through  
30 lower level facilities. The cases referred to it are therefore more severe or need more specialized  
31 attention than those at lower level facilities. Similarly, before a patient comes to the higher level  
32 facility, they would have spent more on transport cost since it is centrally located in the County.  
33 They would also have spent more time caring for the ill child at the lower level facility prior to  
34 referral higher level. This may explain why the cost involved is at higher level facilities is higher  
35 compared to lower level facilities.  
36  
37  
38  
39  
40  
41  
42  
43  
44  
45

46 The average number of days spent in the facility was 2 days. For every additional day spent in  
47 the facility, the total cost of care increased by USD 2.35 (95% CI= 1.23, 3.48). The number of  
48 days spent in the facility may also have been influenced by factors such the severity of illness at  
49 admission, the time taken before seeking care, quality of care and the bed capacity of the hospital  
50 [16,17].  
51  
52  
53  
54  
55

1  
2  
3  
4  
5 Being prescribed medicines by a Clinical Officer led to the total cost being lower by USD 7.5  
6 (95% CI= 3.17, 11.76) compared being prescribed to by a Medical Officer. This may be because  
7 medical doctors tend to prescribe branded medicines more than their generic versions [18].  
8 However, in government health facilities where patients don't pay for consultation, this  
9 observation cannot be fully explained. Studies elsewhere have also reported that seeking care  
10 from medical doctors is more costly than lower cadre health care providers [19]. Medical officers  
11 were more often found in higher level facilities which are few and centrally located hence  
12 accessing them attracted more transport and hotel costs. In many cases of paediatric malaria  
13 treatment, the main cost centres are often consultation, medicines, transport and hospitalization  
14 with the most significant being the cost of medicines [20]. In the contrary, from our findings, the  
15 greatest contributor to the total cost of care is the opportunity cost of productive time lost while  
16 caring for the sick child.  
17  
18  
19  
20  
21  
22  
23  
24  
25  
26

## 27 **Conclusion**

28  
29 The Homa-Bay County Referral Hospital (level V) is much more costly than the other lower  
30 level health facilities in the county indicating that the poorest who may not afford or access the  
31 specialized treatment offered thus may be financially barred from obtaining the superior  
32 paediatric malaria care. The top two drivers of patient borne cost of paediatric malaria treatment  
33 in Homa-Bay County are being admitted at the County referral hospital and a medical officer  
34 prescribing the medication. Efforts aiming at reducing the cost of paediatric malaria treatment  
35 therefore need to focus on availing quality treatment at the lower level facilities through better  
36 trained and experienced staffing, performance monitoring and improved infrastructure.  
37  
38  
39  
40  
41  
42  
43  
44

## 45 **Unanswered questions and future research**

46 From our findings, one of the greatest contributors to cost of treatment is being treated by a  
47 medical officer. It is not clear why this would be so especially in public health facilities where  
48 patients don't pay directly for consultation. This could be some form of indictment on the  
49 training and experience as well as training on treatment guidelines of medical staff in public  
50  
51  
52  
53  
54  
55



1  
2  
3 service. There is therefore need for further research in other Counties and regions to attempt to  
4 validate this finding.  
5  
6  
7

### 8 **Acknowledgements**

9  
10 We wish to acknowledge the statistician, Dr. Alex Mwaniki for his assistance with the  
11 conceptualization of the study design and data analysis.  
12  
13  
14

### 15 **Funding**

16  
17 This research received no specific grant from any funding agency in the public, commercial or  
18 not-for-profit sectors.  
19  
20  
21

### 22 **Data Sharing**

23  
24 Data are available upon reasonable request. The data is deidentified participant data and is  
25 available from the corresponding author of email address; kodhiambo.maurice@ [ku.ac.ke](mailto:kodhiambo.maurice@ku.ac.ke).  
26 Additional information available is the study protocol as approved the ethics committee.  
27  
28  
29

### 30 **Competing Interests**

31  
32 The authors declare that they have no competing interests.  
33  
34  
35

### 36 **Author Contributions**

37  
38 The conceptualization and protocol development was done by all the authors. Data collection and  
39 analysis was done by MOK. MOK drafted the manuscript which was validated and edited by  
40 JOO and BKA. All authors gave final approval of the version to be published. All authors  
41 declare neither financial nor personal relationship conflict of interest. All authors agree to be  
42 accountable for all aspects of the work in ensuring that questions related to the accuracy or  
43 integrity of any part of the work are appropriately investigated and resolved.  
44  
45  
46  
47

### 48 **References**

49  
50 **1. Buigut S, Ettarh R, Amendah DD.** Catastrophic health expenditure and its determinants in  
51 Kenya slum communities. *Int J Equity Health*. 2015 May 14;14:46. doi: 10.1186/s12939-015-  
52 0168-9.  
53  
54  
55

- 1  
2  
3  
4  
5  
6  
7  
8  
9  
10  
11  
12  
13  
14  
15  
16  
17  
18  
19  
20  
21  
22  
23  
24  
25  
26  
27  
28  
29  
30  
31  
32  
33  
34  
35  
36  
37  
38  
39  
40  
41  
42  
43  
44  
45  
46  
47  
48  
49  
50  
51  
52  
53  
54  
55
2. **Ayieko P**, Ogero M, Makone B, Julius T, Mbevi G, Nyachiro W, Nyamai R, Were F, Githanga D, Irimu G, English M; Clinical Information Network authors. Characteristics of admissions and variations in the use of basic investigations, treatments and outcomes in Kenyan hospitals within a new Clinical Information Network. *Arch Dis Child*. 2015 Dec 10. [Epub ahead of print] 3. World Health Organization (2015). *World Malaria Report 2015*, Geneva, World Health Organization
4. **Onwujekwe O**, Hanson K, Uzochukwu B, Ichoku H, Ike E, Onwughalu B. Are malaria treatment expenditures catastrophic to different socio-economic and geographic groups and how do they cope with payment? A study in southeast Nigeria. *Trop Med Int Health*. 2010 Jan;15(1):18-25. doi: 10.1111/j.1365-3156.2009.02418.x. Epub 2009 Nov 3.
5. **Sicuri E**, Vieta A, Lindner L, Constenla D, Sauboin C. The economic costs of malaria in children in three sub-Saharan countries: Ghana, Tanzania and Kenya. *Malar J*. 2013 Sep 3; 12:307. doi: 10.1186/1475-2875-12-307.
6. **Sicuri E**, Davy C, Marinelli M, Oa O, Ome M, Siba P, Conteh L, Mueller I. The economic cost to households of childhood malaria in Papua New Guinea: a focus on intra-country variation. *Health Policy Plan*. 2012 Jul;27(4):339-47. doi: 10.1093/heapol/czr046. Epub 2011 Jun 22.
7. **Barasa E**, Ayieko P, Cleary S, English M. Out-of-pocket costs for paediatric admissions in district hospitals in Kenya. *Trop Med Int Health*. 2012 Aug;17(8):958-61. doi: 10.1111/j.1365-3156.2012.03029. x. Epub 2012 Jun 21. Page 15 of 105
8. <http://datatopics.worldbank.org/world-development-indicators/stories/the-classification-of-countries-by-income.html> Oct 4, 2018
9. UN Inter-agency Group for Child Mortality Estimation, 2019. Kenya Country Summary, March 2017
10. Kenya National Bureau of Statistics (KNBS). (2016). *Statistical Abstract 2015*. Nairobi: KNBS.
11. **Johnston K**, Lakzadeh P, Donato B, Szabo S. Methods of sample size calculation in descriptive retrospective burden of illness studies. *BMC Med Res Methodol*. 2019 Jan 9;19(1):9. doi: 10.1186/s12874-018-0657-9.

- 1  
2  
3 **12. Comfort** B, Janneke H, Sungano M, Stillman K, Gabert R, Korde S, Nachbar N, Derriennic  
4 Y, Musau S, Hamazakaza P, Zyambo K, Zyongwe N, Hamainza B and Thuma P. Hospitalization  
5 and costs incurred at the facility level after scale-up of malaria control; Pre- Post comparisons  
6 from two hospitals in Zambia. *Am J Trop Med Hyg.* 2014 Jan. 8; 90(1): 20-32.  
7  
8  
9 **13. Ayieko** P, Okumu A, Griffith U and English M. The Economic burden of inpatient paediatric  
10 care in Kenya: household and provider costs for treatment of pneumonia, malaria and meningitis.  
11 *Cost Eff Resource Alloc.* 2009; 7:3  
12  
13 **14. Burke** RM, Rebolledo PA, Embrey SR, Wagner LD, Cowden CL, Kelly FM, Smith ER,  
14 Iñiguez V, Leon JS. The burden of pediatric diarrhea: a cross-sectional study of incurred costs  
15 and perceptions of cost among Bolivian families. *BMC Public Health.* 2013 Aug 2; 13:708. doi:  
16 10.1186/1471-2458-13-708.  
17  
18 **15. Xia** S, Ma J, Wang D, Li S, Rollinson D, Zhou X. Economic cost analysis of malaria case  
19 management at the household level during the malaria elimination phase in The People's  
20 Republic of China. *Infect Dis Poverty.* 2016 Jun 3;5(1):50. doi: 10.1186/s40249-016-0141-x.  
21  
22 22.  
23  
24 **16. Kyaw** SS, Drake T, Ruangveerayuth R, Chierakul W, White NJ, Newton PN, Lubell Y. Cost  
25 of treating inpatient falciparum malaria on the Thai-Myanmar border. *Malar J.* 2014 Oct 29;  
26 13:416. doi: 10.1186/1475-2875-13-416. Page 16 of 105  
27  
28 **17. Beogo**, Huang N, Drabo MK, Yé Y. Malaria related care-seeking-behaviour and  
29 expenditures in urban settings: A household survey in Ouagadougou, Burkina Faso. *Acta Trop.*  
30 2016 Aug; 160:78-85. doi: 10.1016/j.actatropica.2016.03.033. Epub 2016 May 3.  
31  
32 **18. Adair** FR, Holmgren LR. Do drug samples influence resident prescribing behavior? A  
33 randomized trial. *The American Journal of Medicine* Volume 118, Issue 8, August 2005, Pages  
34 881-88  
35  
36 **19. Soremekun** S, Kasteng F, Lingam R, Vassall A, Kertho E, Settumba S, Etou PL, Nanyonjo  
37 A, Ten Asbroek G, Kallander K, Kirkwood B; inSCALE Study Group. Variation in the quality  
38 and out-of-pocket cost of treatment for childhood malaria, diarrhoea, and pneumonia:  
39 Community and facility based care in rural Uganda. *PLoS One.* 2018 Nov 26;13(11):e0200543.  
40 doi: 10.1371/journal.pone.0200543. eCollection 2018.  
41  
42  
43  
44  
45  
46  
47  
48  
49  
50  
51  
52  
53  
54  
55

1  
2  
3 **20. Nabyonga O, Mugisha F, Okui A, Musango L, Kirigia J. Health care seeking patterns and**  
4 **determinants of out-of-pocket expenditure for malaria for the children under-five in Uganda.**  
5 **Malar J. 2013 May 31; 12:175. doi: 10.1186/1475-2875-12-175.**  
6  
7  
8  
9  
10  
11  
12  
13  
14  
15  
16  
17  
18  
19  
20  
21  
22  
23  
24  
25  
26  
27  
28  
29  
30  
31  
32  
33  
34  
35  
36  
37  
38  
39  
40  
41  
42  
43  
44  
45  
46  
47  
48  
49  
50  
51  
52  
53  
54  
55

## CHEERS checklist—Items to include when reporting economic evaluations of health interventions

| Section/item                                           | Item No | Recommendation                                                                                                                                                                                                                                                                                                              | Reported on page No/<br>line No                      |
|--------------------------------------------------------|---------|-----------------------------------------------------------------------------------------------------------------------------------------------------------------------------------------------------------------------------------------------------------------------------------------------------------------------------|------------------------------------------------------|
| <b>Title and abstract</b>                              |         |                                                                                                                                                                                                                                                                                                                             |                                                      |
| Title                                                  | 1       | Identify the study as an economic evaluation or use more specific terms such as “cost-effectiveness analysis”, and describe the interventions compared.                                                                                                                                                                     | page 1, line 2                                       |
| Abstract                                               | 2       | Provide a structured summary of objectives, perspective, setting, methods (including study design and inputs), results (including base case and uncertainty analyses), and conclusions.                                                                                                                                     | page 2, line 10 to 33                                |
| <b>Introduction</b>                                    |         |                                                                                                                                                                                                                                                                                                                             |                                                      |
| Background and objectives                              | 3       | Provide an explicit statement of the broader context for the study.                                                                                                                                                                                                                                                         | page 2, line 16 to 30                                |
|                                                        |         | Present the study question and its relevance for health policy or practice decisions.                                                                                                                                                                                                                                       | page 2, line 34 to 36                                |
| <b>Methods</b>                                         |         |                                                                                                                                                                                                                                                                                                                             |                                                      |
| Target population and subgroups                        | 4       | Describe characteristics of the base case population and subgroups analysed, including why they were chosen.                                                                                                                                                                                                                | page 4, line 7 to 12;                                |
| Setting and location                                   | 5       | State relevant aspects of the system(s) in which the decision(s) need(s) to be made.                                                                                                                                                                                                                                        | page 3, line 10 to 24                                |
| Study perspective                                      | 6       | Describe the perspective of the study and relate this to the costs being evaluated.                                                                                                                                                                                                                                         | page 1, line 12;<br>page 4, line 1;                  |
| Comparators                                            | 7       | Describe the interventions or strategies being compared and state why they were chosen.                                                                                                                                                                                                                                     | Not applicable since this was simply a cost analysis |
| Time horizon                                           | 8       | State the time horizon(s) over which costs and consequences are being evaluated and say why appropriate.                                                                                                                                                                                                                    | Not applicable since this was simply a cost analysis |
| Discount rate                                          | 9       | Report the choice of discount rate(s) used for costs and outcomes and say why appropriate.                                                                                                                                                                                                                                  | Not applicable since this was simply a cost analysis |
| Choice of health outcomes                              | 10      | Describe what outcomes were used as the measure(s) of benefit in the evaluation and their relevance for the type of analysis performed.                                                                                                                                                                                     | Not applicable since this was simply a cost analysis |
| Measurement of effectiveness                           | 11a     | <i>Single study-based estimates:</i> Describe fully the design features of the single effectiveness study and why the single study was a sufficient source of clinical effectiveness data.                                                                                                                                  | Not applicable since this was simply a cost analysis |
|                                                        | 11b     | <i>Synthesis-based estimates:</i> Describe fully the methods used for identification of included studies and synthesis of clinical effectiveness data.                                                                                                                                                                      |                                                      |
| Measurement and valuation of preference based outcomes | 12      | If applicable, describe the population and methods used to elicit preferences for outcomes.                                                                                                                                                                                                                                 | Not applicable since this was simply a cost analysis |
| Estimating resources and costs                         | 13a     | <i>Single study-based economic evaluation:</i> Describe approaches used to estimate resource use associated with the alternative interventions. Describe primary or secondary research methods for valuing each resource item in terms of its unit cost. Describe any adjustments made to approximate to opportunity costs. |                                                      |
|                                                        | 13b     | <i>Model-based economic evaluation:</i> Describe                                                                                                                                                                                                                                                                            | page 6, line 2 to                                    |

| Section/item                         | Item No | Recommendation                                                                                                                                                                                                                                                                                                                                        | Reported on page No/<br>line No                                                                                                                                             |
|--------------------------------------|---------|-------------------------------------------------------------------------------------------------------------------------------------------------------------------------------------------------------------------------------------------------------------------------------------------------------------------------------------------------------|-----------------------------------------------------------------------------------------------------------------------------------------------------------------------------|
|                                      |         | approaches and data sources used to estimate resource use associated with model health states. Describe primary or secondary research methods for valuing each resource item in terms of its unit cost. Describe any adjustments made to approximate to opportunity costs.                                                                            | page 6.                                                                                                                                                                     |
| Currency, price date, and conversion | 14      | Report the dates of the estimated resource quantities and unit costs. Describe methods for adjusting estimated unit costs to the year of reported costs if necessary. Describe methods for converting costs into a common currency base and the exchange rate.                                                                                        | page 6, table 7 to 9;                                                                                                                                                       |
| Choice of model                      | 15      | Describe and give reasons for the specific type of decision-analytical model used. Providing a figure to show model structure is strongly recommended.                                                                                                                                                                                                | page 6, line 23 to 25;                                                                                                                                                      |
| Assumptions                          | 16      | Describe all structural or other assumptions underpinning the decision-analytical model.                                                                                                                                                                                                                                                              | Assumption of linearity was made                                                                                                                                            |
| Analytical methods                   | 17      | Describe all analytical methods supporting the evaluation. This could include methods for dealing with skewed, missing, or censored data; extrapolation methods; methods for pooling data; approaches to validate or make adjustments (such as half cycle corrections) to a model; and methods for handling population heterogeneity and uncertainty. | page 6, line 23 to 25;                                                                                                                                                      |
| <b>Results</b>                       |         |                                                                                                                                                                                                                                                                                                                                                       |                                                                                                                                                                             |
| Study parameters                     | 18      | Report the values, ranges, references, and, if used, probability distributions for all parameters. Report reasons or sources for distributions used to represent uncertainty where appropriate. Providing a table to show the input values is strongly recommended.                                                                                   | page 7, line 1 to 15;<br>page 7, Table 3;<br>page 9, Table 4;<br>page 10, table 5;<br>page 11, table 6;<br>page 11, line 19 to<br>page 12 line 2;<br>page 12, line 3 to 16; |
| Incremental costs and outcomes       | 19      | For each intervention, report mean values for the main categories of estimated costs and outcomes of interest, as well as mean differences between the comparator groups. If applicable, report incremental cost-effectiveness ratios.                                                                                                                | Not Applicable                                                                                                                                                              |
| Characterising uncertainty           | 20a     | <i>Single study-based economic evaluation:</i> Describe the effects of sampling uncertainty for the estimated incremental cost and incremental effectiveness parameters, together with the impact of methodological assumptions (such as discount rate, study perspective).                                                                           |                                                                                                                                                                             |
|                                      | 20b     | <i>Model-based economic evaluation:</i> Describe the effects on the results of uncertainty for all input parameters, and uncertainty related to the structure of the model and assumptions.                                                                                                                                                           | Not applicable                                                                                                                                                              |
| Characterising heterogeneity         | 21      | If applicable, report differences in costs, outcomes, or cost-effectiveness that can be explained by variations between subgroups of patients with different baseline characteristics or other observed variability in effects that are not reducible by more information.                                                                            | not applicable                                                                                                                                                              |
| <b>Discussion</b>                    |         |                                                                                                                                                                                                                                                                                                                                                       |                                                                                                                                                                             |
| Study findings, limitations,         | 22      | Summarise key study findings and describe how they                                                                                                                                                                                                                                                                                                    | page 12, line 13 to                                                                                                                                                         |

1  
2  
3  
4  
5  
6  
7  
8  
9  
10  
11  
12  
13  
14  
15  
16  
17  
18  
19  
20  
21  
22  
23  
24  
25  
26  
27  
28  
29  
30  
31  
32  
33  
34  
35  
36  
37  
38  
39  
40  
41  
42  
43  
44  
45  
46  
47  
48  
49  
50  
51  
52  
53  
54  
55  
56  
57  
58  
59  
60

| Section/item                                                                                                     | Item No | Recommendation                                                                                                                                                                                                                                    | Reported on page No/<br>line No                |
|------------------------------------------------------------------------------------------------------------------|---------|---------------------------------------------------------------------------------------------------------------------------------------------------------------------------------------------------------------------------------------------------|------------------------------------------------|
| generalisability, and current knowledge                                                                          |         | support the conclusions reached. Discuss limitations and the generalisability of the findings and how the findings fit with current knowledge.                                                                                                    | page 14, line 3                                |
| <b>Other</b>                                                                                                     |         |                                                                                                                                                                                                                                                   |                                                |
| Source of funding                                                                                                | 23      | Describe how the study was funded and the role of the funder in the identification, design, conduct, and reporting of the analysis. Describe other non-monetary sources of support.                                                               | Information provided via the submission system |
| Conflicts of interest                                                                                            | 24      | Describe any potential for conflict of interest of study contributors in accordance with journal policy. In the absence of a journal policy, we recommend authors comply with International Committee of Medical Journal Editors recommendations. | Information provided via the submission system |
| For consistency, the CHEERS statement checklist format is based on the format of the CONSORT statement checklist |         |                                                                                                                                                                                                                                                   |                                                |

# BMJ Open

## Modeling the Household cost of Paediatric Malaria Treatment in a Rural County in Kenya; Do non-user fee payments matter? A partial cost of illness analysis

|                                 |                                                                                                                                                                                       |
|---------------------------------|---------------------------------------------------------------------------------------------------------------------------------------------------------------------------------------|
| Journal:                        | <i>BMJ Open</i>                                                                                                                                                                       |
| Manuscript ID                   | bmjopen-2019-033192.R2                                                                                                                                                                |
| Article Type:                   | Research                                                                                                                                                                              |
| Date Submitted by the Author:   | 14-Feb-2020                                                                                                                                                                           |
| Complete List of Authors:       | Kodhiambo, Maurice; Kenyatta University, Pharmacy<br>Oyugi, Julius; University of Nairobi, Medical Microbiology<br>Amugune, Beatrice; University of Nairobi, Pharmaceutical Chemistry |
| <b>Primary Subject Heading</b>: | Health economics                                                                                                                                                                      |
| Secondary Subject Heading:      | Health policy, Health services research                                                                                                                                               |
| Keywords:                       | Community child health < PAEDIATRICS, HEALTH ECONOMICS, Health policy < HEALTH SERVICES ADMINISTRATION & MANAGEMENT                                                                   |
|                                 |                                                                                                                                                                                       |

SCHOLARONE™  
Manuscripts





I, the Submitting Author has the right to grant and does grant on behalf of all authors of the Work (as defined in the below author licence), an exclusive licence and/or a non-exclusive licence for contributions from authors who are: i) UK Crown employees; ii) where BMJ has agreed a CC-BY licence shall apply, and/or iii) in accordance with the terms applicable for US Federal Government officers or employees acting as part of their official duties; on a worldwide, perpetual, irrevocable, royalty-free basis to BMJ Publishing Group Ltd ("BMJ") its licensees and where the relevant Journal is co-owned by BMJ to the co-owners of the Journal, to publish the Work in this journal and any other BMJ products and to exploit all rights, as set out in our [licence](#).

The Submitting Author accepts and understands that any supply made under these terms is made by BMJ to the Submitting Author unless you are acting as an employee on behalf of your employer or a postgraduate student of an affiliated institution which is paying any applicable article publishing charge ("APC") for Open Access articles. Where the Submitting Author wishes to make the Work available on an Open Access basis (and intends to pay the relevant APC), the terms of reuse of such Open Access shall be governed by a Creative Commons licence – details of these licences and which [Creative Commons](#) licence will apply to this Work are set out in our licence referred to above.

Other than as permitted in any relevant BMJ Author's Self Archiving Policies, I confirm this Work has not been accepted for publication elsewhere, is not being considered for publication elsewhere and does not duplicate material already published. I confirm all authors consent to publication of this Work and authorise the granting of this licence.

## Modeling the Household cost of Paediatric Malaria Treatment in a Rural County in Kenya; do non-user fee payments matter? A partial cost of illness analysis

*Kodhiambo, Maurice Onditi<sup>1</sup>, Oyugi, Julius Otieno<sup>2</sup> and Amugune, Beatrice Kagai<sup>3</sup>*

*1. School of Pharmacy, Kenyatta University, P.O. Box 43844-00100, Nairobi, Kenya., Cell Phone-+254724468162, Email: kodhiambo.maurice@ku.ac.ke **Corresponding Author***

*2. Department of Medical Microbiology, University of Nairobi, Nairobi, Kenya.*

*Email:julias.oyugi9@gmail.com*

*3. Department of Pharmaceutical Chemistry, University of Nairobi, Nairobi, Kenya. Email*

*[beatrice.amugune@uonbi.ac.ke](mailto:beatrice.amugune@uonbi.ac.ke)*

### ABSTRACT

**Objective:** The objective of this study was to develop an econometric model for the cost of treatment of paediatric malaria from a patient perspective in a resource scarce rural setting of Homa-Bay County, Kenya. We sought to investigate the main contributors as well as the contribution of non-user fee payments to the total household cost of care. Costs were measured from a patient perspective.

**Design:** The study was conducted as a health facility based cross sectional survey targeting paediatric patients.

**Setting:** The study was conducted in 13 health facilities ranging from level II to level V in Homa Bay County which is in the Eastern shores of Lake Victoria, Kenya. This is a malaria endemic area.

**Participants:** We enrolled 254 inpatient children (139 males and 115 females) all of whom participated up to the end of this study.

**Primary outcome measure:** The primary outcome measure was the cost of pediatric malaria care borne by the patient. This was measured by asking exiting caregivers to estimate the cost of various items contributing to their total expenditure on care seeking.

**Results:** A total of 254 respondents who consented from 13 public government health facilities were interviewed. Age, number of days spent at the health facility, being treated at a level V facility, medical officer prescribing and seeking initial treatment from a retail shop were found significant predictors of cost.

**Conclusion** Higher level health facilities in Homa-Bay County, where the more specialized medical workers are stationed, are more costly hence barring the poorest from obtaining quality paediatric malaria care from here. . Waiving user fees alone may not be sufficient to guarantee access to care by patients due to unofficial fees and non user fees expenditures..

**Keywords:** Modeling, Household Cost of treatment, Paediatric malaria, Homa-Bay County

### Strengths and limitations of this study

#### Strengths

- The study includes both direct and indirect costs including opportunity cost of time lost for caring for the patient.
- We used robust statistical analysis; stepwise regression analysis was chosen to take care of any possible confounders to the study findings.

### Limitations

- The study was conducted from a patient perspective thus restricting interpretation of the findings to the patient perspective only.
- The data was collected solely through exit interviews of caregivers.
- The study was conducted in one county and the findings may therefore not be generalizable to all counties in Kenya due to geographic and socioeconomic variations.

### INTRODUCTION

Cost of health care services in sub-Saharan Africa is a major impediment to attainment of Universal Health Coverage [1]. Malaria is a major cause of paediatric morbidity and mortality in this part of the world [2,3]. The burden of malaria treatment on households is felt most among poor rural populations [4]. Understanding the cost drivers for the treatment of paediatric malaria is important for devising strategies for optimizing such costs. Few cost modeling studies on paediatric malaria treatment in resource scarce settings, from a patient perspective, have been performed as is the case in this study. Most models have not included costs ingredients such as forgone earnings and cost of transportation to and from the health facility [5]. When free treatment policy for malaria in children under the age of 5 years was introduced in Kenya in the year 2005, it was expected that such a shift would improve financial access to treatment by the poorest patients. This assumption however did not include non-user fee payments and other intangible costs that have been shown to be significantly associated with the risk of catastrophic household health expenditure [6]. There have however been reports of several unofficial user fees being charged for paediatric malaria treatment despite their official abolition [7]. This necessitates costing malaria treatment from a patient perspective in order to capture all costs incurred by the patient in the process of care seeking. The objective of this study was to develop a cost model for the treatment of paediatric malaria from a patient perspective in the resource scarce setting of Homa-Bay County, Kenya.

## **METHODS**

### **Study setting**

Kenya is classified by the World Bank as a lower middle income country [8] with the under-five mortality rate at 45.6 per 1000 live births [9]. Homa-Bay is a rural County with a predominantly peasant economy with poverty levels above the national average and some of the poorest child health indicators in the Kenya. In 2016, the County under-five mortality was 130 per 1000 live births [10]. The Kenya Demographic and Health Survey (KDHS) 2014 also indicated that most residents of Homa-Bay County lie in the lowest wealth quintile with an unfavourable Gini coefficient. These are economic indicators that may demonstrate that the average income of the residents is low. The County is located in the Eastern shores of Lake Victoria hence has climatic conditions that favour malaria endemicity, with pregnant women and children bearing the greatest burden of the disease. The prevalence of malaria in Homa-Bay County, as of 2016, was 58,820 per 100000 persons, which was more than double the national prevalence of 20,252 per 100,000 persons at that time (10). Malaria incidence usually peaks in Kenya around September to October rainy season which coincides with the time the study was conducted.

### **Study design**

The study was conducted as a cross sectional survey. This design was considered appropriate since it was strategic and affordable to collect all the data from the patients in one encounter at the end of the treatment process. Both the exposures and outcome were examined at the same time.

### **Costing Approach**

Costing was conducted from a patient perspective. The total costs were summed up from component expenditures incurred per category in the process of procuring care for the child with malaria as reported by the caregiver. In this study, the costing was computed to include all user fees and non-user fee monetary expenditures incurred by the caregiver in the process of seeking care for the sick child.

### **Target population**

The target population comprised all children below 13 years exiting government health facilities in Homa-Bay County after treatment for malaria during the period of study. Children below the age of 13 years were targeted because they tend to depend wholly on their parents or guardians for health seeking decisions since they are not yet independent financially or socially.

### Sampling

The sample size was based on the Melody study [11] which recommends that for cost outcomes, a sample size of approximately 200 would be required to generate a 95% CI precise to within  $\pm 10\%$  of the mean. A multistage sampling approach was adopted. First, the County was divided into eight zones; the eight sub-counties. The health facilities were then stratified based on service provision levels (level II to level V, Table 1). The County had neither a level I nor a VI facility and only one level V facility at the time of data collection. The level five facility was purposively included in the sample. Therefore, actual facility sampling was done only for levels II, III and IV facilities. A total of 13 facilities were sampled as shown in Table 2. From each facility, approximately 20 in-patients were sampled using the systematic random sampling approach where every other paediatric patient exiting after treatment for malaria was approached by the research assistant for recruitment. This process was repeated on daily basis until the targeted sample size of 254 participants was met.

**Table 1: Classification of Health facilities based on service level**

| Facility level | Basis                         | Services offered                                                                                                                                              |
|----------------|-------------------------------|---------------------------------------------------------------------------------------------------------------------------------------------------------------|
| Level I        | Community                     | A range of preventive and curative services with a focus on primary care services.                                                                            |
| Level II       | Dispensaries                  | Management of common illnesses in the specific region                                                                                                         |
| Level III      | Health centers                | Formal immunization programs, HIV testing and referral                                                                                                        |
| Level IV       | District referral hospitals   | Antenatal care (ANC) and routine birthing services, HIV/AIDS care (96%), paediatric services (93%), and emergency obstetric care (EmOC) (78%).                |
| Level V        | Provincial referral hospitals | Surgical services, internal medicine, and specialty services such as emergency EmOC and anesthesiology but less extensive as the National Referral Hospitals. |
| Level VI       | National referral hospitals   | Surgical services, internal medicine, and specialty services such as EmOC and anesthesiology                                                                  |

**Source:** Ministry of Health, 2017: The Health care system in Kenya and Kenyan healthcare sector: market study report

**Table 2: Number of health facilities and participants sampled in the study**

| Facility level                | II | III | IV  | V  | Total |
|-------------------------------|----|-----|-----|----|-------|
| Number of facilities          | 13 | 9   | 12  | 1  | 35    |
| Number of facilities sampled  | 4  | 3   | 5   | 1  | 13    |
| Number of in-patients sampled | 68 | 54  | 100 | 32 | 254   |

### Recruitment of study participants

A research assistant approached a caregiver of an in-patient who had just been treated for malaria at the time of exit. This was followed by self introduction after which the caregiver was requested to read the consent explanation (in a language they best understood- English, Swahili or Luo) and consider consenting.

### Data collection

Data on contributors to cost as well as cost of paediatric malaria treatment was collected from August 2016 to November 2016 by use of a structured exit interview guide on consented participants. This period was selected because malaria infections in the region usually peak during rainy seasons of September to October. Both direct costs such as out of pocket payments and cost of medicines purchased as well as indirect costs such as transport, food, waiting time and opportunity cost incurred while taking care of the sick child were measured in Kenya shillings but reported in USD ( 100 K.Shs = 1 USD) .

The interviewers were trained to probe opportunity cost borne by caregivers in the process of seeking health care for the sick child by asking them to state their occupation. From this, the approximate forgone benefit was estimated to triangulate the information gathered from their response to the direct questions posed to the caregiver about their estimated opportunity cost.

### Quality assurance

Data collectors were trained for two days on the survey tool as well as the procedure in a classroom setting and then practised in the pre-test health facility outside the data collection area (Migori County). Data collection instruments were examined by supervisors and other experts to ascertain their quality and validity.

### Data analysis

1  
2  
3 Data was checked for completeness, cleaned, sorted and coded. This was followed by data entry  
4 into excel (2016) spreadsheet in readiness for analysis by use of the R statistical software to  
5 compute descriptive statistics on cost of treatment. The cost of treatment was then further  
6 modeled on R (Studio) statistical package using a stepwise multiple linear regression approach.  
7  
8  
9

### 11 12 **Ethical Considerations**

13 All principles pertaining ethical conduct of research with human subjects were adhered to in this  
14 study as embodied in the Declaration of Helsinki. Ethical approval was obtained from the  
15 Kenyatta National Hospital/University of Nairobi-Ethics and Review Committee (KNH-UON  
16 ERC Ref-P389/05/2016).  
17  
18  
19

### 21 22 **Patient and Public Involvement**

23 Given that there was no funding for this study, no funds or time was allocated for patient or  
24 public involvement. We were therefore unable to involve patients. However, we plan to invite  
25 representatives of the public to help us write a plain language summary for further dissemination  
26 of the results.  
27  
28  
29  
30

### 31 32 **RESULTS**

33 The survey was conducted across various health facilities ranging from level II to level V. Most  
34 of the participating children, 47.6% (121), had been treated in level IV facilities. Level II  
35 facilities had 26.8% (68) of the children; level III had 21.3% (54) and level V had 4.3% (11).  
36 Most participants, 55.5% (141), were 4-6 years old. Male children were 54.7% (139) while  
37 females were 45.3% (115). Most of the participants, 62.6% (159), travelled for 2 to 5 km to reach  
38 the health facility using mainly a motorcycle as the preferred means of transport 66.1% (168).  
39 After reaching the hospital, most of them, 72% (183), waited for about one hour to be served  
40 while 18.1%(46) were attended to within 30 minutes. Medical officers, 46.5% (118) were the  
41 most common prescribers followed by clinical officers at 35.8% (91). Nurses prescribed for  
42 17.7% (45) of the respondents. Most caregiver-respondents, 70% (178), stayed in the hospital  
43 with their children for two days or less with most of them, 61.8% (157), describing the condition  
44 of their children at admission as not very sick. Most of the participants 48 %( 122) first sought  
45  
46  
47  
48  
49  
50  
51  
52  
53  
54  
55  
56  
57  
58  
59  
60

medical care in a community pharmacy outlet before proceeding to a government health facility.

Table 3 is a summary of the baseline characteristics of the study participants.

**Table 3: Sociodemographic characteristics of study participants**

| <b>Factor</b>                                       | <b>Number of children</b> | <b>%</b> |
|-----------------------------------------------------|---------------------------|----------|
| <b><i>Facility Level</i></b>                        |                           |          |
| Level II                                            | 68                        | 26.80    |
| Level III                                           | 54                        | 21.30    |
| Level IV                                            | 121                       | 47.30    |
| Level V                                             | 11                        | 4.40     |
| <b><i>Age of child</i></b>                          |                           |          |
| < 1                                                 | 11                        | 4.30     |
| 1 – 3                                               | 74                        | 29.10    |
| 4 – 6                                               | 141                       | 55.50    |
| 7 – 9                                               | 22                        | 8.70     |
| 10 +                                                | 6                         | 2.40     |
| <b><i>Sex of child</i></b>                          |                           |          |
| Male                                                | 139                       | 54.70    |
| Female                                              | 115                       | 45.30    |
| <b><i>Distance to health facility (Km)</i></b>      |                           |          |
| < 1                                                 | 40                        | 15.70    |
| 2 – 5                                               | 159                       | 62.60    |
| 5 – 10                                              | 50                        | 19.70    |
| > 10                                                | 5                         | 2.00     |
| <b><i>Mode of Transport to health facility</i></b>  |                           |          |
| Ambulance                                           | 2                         | 0.80     |
| Bicycle                                             | 13                        | 5.10     |
| Motorcycle                                          | 168                       | 66.10    |
| On Foot                                             | 55                        | 21.70    |
| Private Vehicle                                     | 4                         | 1.60     |
| Public Service Vehicle                              | 12                        | 4.70     |
| <b><i>Waiting Time before initial treatment</i></b> |                           |          |
| < 30 Minutes                                        | 46                        | 18.10    |
| 1 hr                                                | 183                       | 72.00    |
| 2 hrs                                               | 10                        | 3.90     |
| 3 hrs                                               | 7                         | 2.80     |
| 3 + hrs                                             | 8                         | 3.20     |
| <b><i>Prescriber</i></b>                            |                           |          |
| Clinical Officer                                    | 91                        | 35.80    |
| Medical Officer                                     | 118                       | 46.50    |



|                                                            |     |       |
|------------------------------------------------------------|-----|-------|
| Nurse                                                      | 45  | 17.70 |
| <b>Days of Stay at the facility</b>                        |     |       |
| 1 – 2                                                      | 170 | 66.93 |
| 3 – 5                                                      | 38  | 15.00 |
| 6 – 10                                                     | 38  | 15.00 |
| 10+                                                        | 8   | 3.10  |
| <b>Caregiver reported severity of Illness at admission</b> |     |       |
| Not Very Sick                                              | 157 | 61.80 |
| Very Sick                                                  | 97  | 38.20 |
| <b>Initial treatment site</b>                              |     |       |
| Community Pharmacy outlet                                  | 122 | 48.00 |
| Dispensary (Level II)                                      | 39  | 15.40 |
| Government Hospital                                        | 36  | 14.20 |
| Private Hospital                                           | 36  | 14.20 |
| Religious Leader                                           | 16  | 6.30  |
| Retail Shop                                                | 5   | 2.00  |

### Cost drivers for the treatment of paediatric malaria in Homa-Bay County

The individual patient-reported costs per category were analyzed and summarized as in Table 4.

**Table 4: Patient reported costs of treating paediatric malaria in Homa-Bay County**

|                                     | Cost of Treatment(USD) |        |         |         |
|-------------------------------------|------------------------|--------|---------|---------|
|                                     | Mean                   | Median | Minimum | Maximum |
| Transport                           | 0.81                   | 0.50   | 0       | 20      |
| Food                                | 2.29                   | 2.00   | 0.20    | 18      |
| Value of time used for seeking care | 5.56                   | 3.25   | 1       | 50      |
| Direct Payment                      | 1.38                   | 12     | 0       | 50      |

### Modeling the cost of treating paediatric malaria

The model representing the cost of treating paediatric malaria in Homa-Bay County was developed by use of stepwise multiple linear regression analysis of the costing data collected from the exit interviews. The full model was first formulated as shown in Table 5 followed by a reduced model **after Bootstrapping regression** shown in Table 6.

**Table 5: Full Model of the cost of treatment of paediatric malaria**  
**Full model**

| <b>Full model</b>             |                             |                |                        |              |
|-------------------------------|-----------------------------|----------------|------------------------|--------------|
| <b>Parameter</b>              | <b>Parameter Esti. (se)</b> | <b>95% CI</b>  | <b>t-Value p-Value</b> |              |
|                               |                             | <b>LB – UB</b> |                        |              |
| <b>Age</b>                    | 0,85 (0.42)                 | 0.20-1.59      | 2.00                   | <b>0.047</b> |
| <b>Facility Level</b>         |                             |                |                        |              |
| Level II                      | 1                           |                |                        |              |
| Level III                     | 0.27 (4.08)                 | -9.04– 8.40    | 0.06                   | 0.945        |
| Level IV                      | 2.20 (3.52)                 | -6.54– 8.84    | 0.63                   | 0.533        |
| Level V                       | 7.39 (7.39)                 | -8.74 - 20.94  | 1.00                   | 0.319        |
| <b>Distance to Facility</b>   |                             |                |                        |              |
| 1 – 2 days                    | 1                           |                |                        |              |
| 3 – 5                         | -3.87 (2.64)                | -8.83– 2.26    | -1.5                   | 0.144        |
| 6 – 10                        | 3.89 (3.53)                 | -8.74 – 5.93   | -1.1                   | 0.273        |
| 10 +                          | 4.14 (6.20)                 | -12.31 - 12.30 | 0.7                    | 0.506        |
| <b>Prescriber</b>             |                             |                |                        |              |
| Clinical Officer              | 1                           |                |                        |              |
| Medical Officer               | 6.01(2.55)                  | 0.92 - 11.50   | 2.40                   | <b>0.021</b> |
| Nurse                         | 4.91(2.99)                  | -32.37 – 9.06  | 1.60                   | 0.104        |
| <b>Days of Stay</b>           | 2.11 (0.63)                 | 0.86 – 3.35    | 0.94                   | <b>0.001</b> |
| <b>Waiting Time</b>           |                             |                |                        |              |
| <30 minutes                   | 1                           |                |                        |              |
| Within 1 hr                   | 3.03 (2.38)                 | -2.25 – 7.77   | 1.30                   | 0.206        |
| Within 2 hrs                  | 3.95 (4.60)                 | -6.73 - 12.43  | 0.90                   | 0.392        |
| Within 3 hrs                  | 2.75 (5.15)                 | -8.85 – 8.13   | 0.50                   | 0.594        |
| <b>Initial Treatment site</b> |                             |                |                        |              |
| Community                     |                             |                |                        |              |
| Pharmacy outlet               | 1                           |                |                        |              |
| Dispensary                    | 1.59(4.05)                  | -8.85 – 8.13   | 0.40                   | 0.696        |
| Government Hosp               | 9.59 (8.15)                 | -5.95 - 26.12  | 1.20                   | 0.242        |
| Private Hosp                  | 0.09 (2.91)                 | -4.59 – 6.86   | 0.03                   | 0.976        |
| Religious Leader              | 4.20 (3.02)                 | -0.39 - 12.23  | 1.40                   | 0.168        |
| Retail Shop                   | 14.40 (6.84)                | 1.19 - 29.43   | 2.10                   | <b>0.038</b> |

**R2 = 68%, R2- Adjusted= 62%.**

**Table 6: Reduced model for cost of treating paediatric malaria in Homa Bay County**

| <b>Reduced Model – After Bootstrapping Regression</b> |                            |               |                        |  |
|-------------------------------------------------------|----------------------------|---------------|------------------------|--|
| <b>Parameter</b>                                      | <b>Parameter Est. (se)</b> | <b>95% CI</b> | <b>t-Value p-Value</b> |  |

|                                 |              |             |      |                  |
|---------------------------------|--------------|-------------|------|------------------|
| <b>Age (years)</b>              | 0.83 (0.45)  | -0.05-1.71  | 1.8  | 0.066            |
| <b>Facility Level</b>           |              |             |      |                  |
| Level II                        | 1            |             |      |                  |
| Level III                       | 3.36 (3.19)  | -2.97-9.69  | 1.1  | 0.294            |
| Level IV                        | 5.87 (2.61)  | 0.70-11.04  | 2.3  | <b>0.026</b>     |
| Level V                         | 20.64 (5.13) | 10.49-30.83 | 4.0  | <b>&lt;0.001</b> |
| <b>Days of Stay at facility</b> | 2.38 (0.58)  | 1.23- 3.53  | 4.1  | <b>&lt;0.001</b> |
| <b>Prescriber</b>               |              |             |      |                  |
| Clinical Officer                | 1            |             |      |                  |
| Medical Officer                 | 6.98 (4.29)  | -1.51-15.47 | 2.40 | 0.106            |
| Nurse                           | 2.73 (4.63)  | 6.44-11.90  | 0.59 | 0.556            |

$R^2 = 38\%$ ,  $R^2$ - Adjusted= 33%

A stepwise multiple linear regression was then performed to select the variables that contribute most meaningfully to the model. After this stepwise process, the variables that were isolated as mostly contributing to the model were age, facility levels, days of stay in the facility and prescriber. However, the statistically significant variables were days of stay in the facility (t value = 4.10, p-value < 0.001) and being treated at Level IV & V facilities (t value = 2.3, p-value < 0.05).

From the obtained model, for every additional year of age, the total cost of care increased by USD 0.82 (95% CI= -0.05 – 1.71). Compared to level II facilities, the total cost of care was more expensive by USD 14 (95% CI= 3.25, 24.78) in the level V facilities. For every additional day spent in the facility, the total cost of care increased by USD 2.35 (95% CI= 1.23, 3.48) shillings. Being prescribed medicines by a Clinical Officer led to the total cost being lower by USD. 7.5 (95% CI= 3.17, 11.76) compared to prescription by a Medical Officer. The unadjusted coefficient of determination,  $R^2$ , of the reduced model was 38% and the adjusted  $R^2$  was 33%. This means that 33% of the relationship between cost variables and total cost as captured in this model is explained by the model and not random chance. This model thus explains 33% of the variation in costs. From the variables in the reduced model, a regression equation was developed and summarized as follows;

### The Multiple Linear Regression Equation

The econometric cost model for treating paediatric malaria in Homa-Bay County generated from our data was represented by the generic equation given by;

$$TC = \beta_1 \text{ Age} - \beta_2 \text{ Level 3} - \beta_3 \text{ Level 4} + \beta_4 \text{ Level 5} + \beta_5 \text{ Days of stay} + \beta_6 \text{ MO} + \beta_7 \text{ Nurse} + \epsilon$$

Where

1  
2  
3 **TC** = Total Cost

4  
5 **Level 3** = treated at a level 3 health facility

6  
7 **Level 4** = treated at a level 4 health facility

8  
9 **Level 5** = treated at a level 5 health facility

10 **Days of stay** = Number of days the respondent stays in the facility

11  
12 € = Error term

13 On substitution of the values of the coefficients, the final regression equation is

14  
15 **Total Household Cost** = 3.36\***Level III** +5.87\***Level IV** + 20.63\***Level V** + 23.83\***Days of**  
16 **stay** +6.98\***Medical Officer** +2.73\***Nurse** + €

## 19 20 **Discussion**

21  
22 This study was conducted in Homa-Bay County which is in rural Western Kenya. The findings  
23 may therefore not be generalizable to other parts of the country. Costing was performed from a  
24 patient perspective. The patient perspective was considered the most appropriate because the  
25 survey focused on the individual patients at the point of exiting the process of care. The findings  
26 can therefore only be interpreted from this perspective. The median total cost (USD) was 6.5  
27 with a mean of 10 and a range of 1.4 to 65. This was lower than those reported from a study in  
28 Zambia where the average cost was 32 for uncomplicated and USD 77 for severe complicated  
29 malaria [12] and from an earlier Kenyan Study with an average cost of USD 96 [13].

30  
31  
32  
33  
34  
35  
36  
37  
38 Non-user fees such as cost of transportation and food were almost double the user fees,  
39 indicating that such costs of care could be a major barrier to accessing care in this rural County  
40 even though official user fees for paediatric malaria were abolished by the government. It also  
41 shows that some facilities still charged unofficial user fees thus increasing the barrier to access.  
42 These findings concur with those from a study in Bolivia which indicated that indirect costs still  
43 impeded access to paediatric care irrespective of user fee abolition [14].

44  
45  
46  
47  
48  
49  
50 One of the main contributors to total household costs was the value of time lost in the process of  
51 seeking care. This contributor was however measured subjectively from the verbal reports of  
52 respondents. An attempt to triangulate this information was made by way of asking the  
53  
54  
55  
56  
57  
58  
59  
60

1  
2  
3 respondents to state their occupation. Most previous studies have not incorporated the cost of  
4 time lost due to care seeking in their costing models.

5  
6 Compared to level II facilities, the total cost of care was more expensive by USD 14 (95% CI=  
7 3.25, 24.78) in the level V facility. This increased total cost in higher level hospitals is in  
8 concurrence with the findings of a study in China [15]. The level V facility was centrally located  
9 in the county and had health care providers with higher academic qualifications than those in  
10 lower level facilities. Before a patient is sent to such a facility, they were likely to have gone  
11 through lower level facilities. The cases referred to it are therefore more severe or need more  
12 specialized attention than those at lower level facilities. Similarly, before a patient comes to the  
13 higher level facility, they would have spent more on transport cost since it is centrally located in  
14 the County. They would also have spent more time caring for the ill child at the lower level  
15 facility prior to referral higher level. This may explain why the cost involved is at higher level  
16 facilities is higher compared to lower level facilities.  
17  
18  
19  
20  
21  
22  
23  
24  
25  
26

27 The average number of days spent in the facility was 2 days. For every additional day spent in  
28 the facility, the total cost of care increased by USD 2.35 (95% CI= 1.23, 3.48). The number of  
29 days spent in the facility may also have been influenced by factors such the severity of illness at  
30 admission, the time taken before seeking care, quality of care and the bed capacity of the hospital  
31 [16,17].  
32  
33  
34  
35  
36

37 Being prescribed medicines by a Clinical Officer led to the total cost being lower by USD 7.5  
38 (95% CI= 3.17, 11.76) compared being prescribed to by a Medical Officer. This may be because  
39 medical doctors tend to prescribe branded medicines more than their generic versions [18].  
40 However, in government health facilities where patients don't pay for consultation, this  
41 observation cannot be fully explained. Studies elsewhere have also reported that seeking care  
42 from medical doctors is more costly than lower cadre health care providers [19]. Medical officers  
43 were more often found in higher level facilities which are few and centrally located hence  
44 accessing them attracted more transport and hotel costs. In many cases of paediatric malaria  
45 treatment, the main cost centres are often consultation, medicines, transport and hospitalization  
46 with the most significant being the cost of medicines [20]. In the contrary, from our findings, the  
47  
48  
49  
50  
51  
52  
53  
54  
55  
56  
57  
58  
59  
60

1  
2  
3 greatest contributor to the total cost of care is the opportunity cost of productive time lost while  
4 caring for the sick child.  
5  
6  
7

## 8 **Conclusion**

9  
10 The Homa-Bay County Referral Hospital (level V) is much more costly than the other lower  
11 level health facilities in the county indicating that the poorest who may not afford or access the  
12 specialized treatment offered thus may be financially barred from obtaining the superior  
13 paediatric malaria care. The top two drivers of patient borne cost of paediatric malaria treatment  
14 in Homa-Bay County are being admitted at the County referral hospital and a medical officer  
15 prescribing the medication. Efforts aiming at reducing the cost of paediatric malaria treatment  
16 therefore need to focus on availing quality treatment at the lower level facilities through better  
17 trained and experienced staffing, performance monitoring and improved infrastructure.  
18  
19  
20  
21  
22  
23  
24  
25

## 26 **Unanswered questions and future research**

27 From our findings, one of the greatest contributors to cost of treatment is being treated by a  
28 medical officer. It is not clear why this would be so especially in public health facilities where  
29 patients don't pay directly for consultation. This could be some form of indictment on the  
30 training and experience as well as training on treatment guidelines of medical staff in public  
31 service. There is therefore need for further research in other Counties and regions to attempt to  
32 validate this finding.  
33  
34  
35  
36  
37  
38  
39

## 40 **Acknowledgements**

41 We wish to acknowledge the statistician, Dr. Alex Mwaniki for his assistance with the  
42 conceptualization of the study design and data analysis.  
43  
44  
45

## 46 **Funding**

47 This research received no specific grant from any funding agency in the public, commercial or  
48 not-for-profit sectors.  
49  
50  
51  
52

## 53 **Data Sharing**

1  
2  
3 Extra data can be accessed via the Dryad data repository at <http://datadryad.org/> with the doi:  
4 10.5061/dryad.prr4xgxhn  
5  
6  
7

### 8 **Competing Interests**

9  
10 The authors declare that they have no competing interests.  
11  
12

### 13 **Author Contributions**

14  
15 The conceptualization and protocol development was done by all the authors. Data collection and  
16 analysis was done by MOK. MOK drafted the manuscript which was validated and edited by  
17 JOO and BKA. All authors gave final approval of the version to be published. All authors  
18 declare neither financial nor personal relationship conflict of interest. All authors agree to be  
19 accountable for all aspects of the work in ensuring that questions related to the accuracy or  
20 integrity of any part of the work are appropriately investigated and resolved.  
21  
22  
23  
24  
25

### 26 **References**

- 27  
28 **1. Buigut S, Ettarh R, Amendah DD.** Catastrophic health expenditure and its determinants in  
29 Kenya slum communities. *Int J Equity Health*. 2015 May 14;14:46. doi: 10.1186/s12939-015-  
30 0168-9.  
31  
32 **2. Ayieko P, Ogero M, Makone B, Julius T, Mbevi G, Nyachiro W, Nyamai R, Were F,**  
33 **Githanga D, Irimu G, English M; Clinical Information Network authors.** Characteristics of  
34 admissions and variations in the use of basic investigations, treatments and outcomes in Kenyan  
35 hospitals within a new Clinical Information Network. *Arch Dis Child*. 2015 Dec 10. [Epub ahead  
36 of print]  
37  
38 **3. World Health Organization (2015).** World Malaria Report 2015, Geneva, World Health  
39 Organization  
40  
41 **4. Onwujekwe O, Hanson K, Uzochukwu B, Ichoku H, Ike E, Onwughalu B.** Are malaria  
42 treatment expenditures catastrophic to different socio-economic and geographic groups and how  
43 do they cope with payment? A study in southeast Nigeria. *Trop Med Int Health*. 2010  
44 Jan;15(1):18-25. doi: 10.1111/j.1365-3156.2009.02418.x. Epub 2009 Nov 3.  
45  
46 **5. Sicuri E, Vieta A, Lindner L, Constenla D, Sauboin C.** The economic costs of malaria in  
47 children in three sub-Saharan countries: Ghana, Tanzania and Kenya. *Malar J*. 2013 Sep 3;  
48 12:307. doi: 10.1186/1475-2875-12-307.  
49  
50  
51  
52  
53  
54  
55  
56  
57  
58  
59  
60

- 1  
2  
3 **6. Sicuri E, Davy C, Marinelli M, Oa O, Ome M, Siba P, Conteh L, Mueller I.** The economic  
4 cost to households of childhood malaria in Papua New Guinea: a focus on intra-country  
5 variation. *Health Policy Plan.* 2012 Jul;27(4):339-47. doi: 10.1093/heapol/czr046. Epub 2011  
6 Jun 22.
- 7  
8  
9  
10 **7. Barasa E, Ayieko P, Cleary S, English M.** Out-of-pocket costs for paediatric admissions in  
11 district hospitals in Kenya. *Trop Med Int Health.* 2012 Aug;17(8):958-61. doi: 10.1111/j.1365-  
12 3156.2012.03029. x. Epub 2012 Jun 21. Page 15 of 105
- 13  
14  
15 **8.** [http://datatopics.worldbank.org/world-development-indicators/stories/the-classification-](http://datatopics.worldbank.org/world-development-indicators/stories/the-classification-of-countries-by-income.html)  
16 [of-countries-by-income.html](http://datatopics.worldbank.org/world-development-indicators/stories/the-classification-of-countries-by-income.html) Oct 4, 2018
- 17  
18  
19 **9.** UN Inter-agency Group for Child Mortality Estimation, 2019. Kenya Country Summary,  
20 March 2017
- 21  
22 **10.** Kenya National Bureau of Statistics (KNBS). (2016). *Statistical Abstract 2015*. Nairobi:  
23 KNBS.
- 24  
25 **11. Johnston K, Lakzadeh P, Donato B, Szabo S.** Methods of sample size calculation in  
26 descriptive retrospective burden of illness studies. *BMC Med Res Methodol.* 2019 Jan  
27 9;19(1):9.doi: 10.1186/s12874-018-0657-9.
- 28  
29  
30 **12. Comfort B, Janneke H, Sungano M, Stillman K, Gabert R, Korde S, Nachbar N, Derriennic**  
31 **Y, Musau S, Hamazakaza P, Zyambo K, Zyongwe N, Hamainza B and Thuma P.** Hospitalization  
32 and costs incurred at the facility level after scale-up of malaria control; Pre- Post comparisons  
33 from two hospitals in Zambia. *Am J Trop Med Hyg.* 2014 Jan. 8; 90(1): 20-32.
- 34  
35  
36 **13. Ayieko P, Okumu A, Griffith U and English M.** The Economic burden of inpatient paediatric  
37 care in Kenya: household and provider costs for treatment of pneumonia, malaria and meningitis.  
38 *Cost Eff Resource Alloc.* 2009; 7:3
- 39  
40  
41  
42 **14. Burke RM, Rebolledo PA, Embrey SR, Wagner LD, Cowden CL, Kelly FM, Smith ER,**  
43 **Iñiguez V, Leon JS.** The burden of pediatric diarrhea: a cross-sectional study of incurred costs  
44 and perceptions of cost among Bolivian families. *BMC Public Health.* 2013 Aug 2; 13:708. doi:  
45 10.1186/1471-2458-13-708.
- 46  
47  
48  
49 **15. Xia S, Ma J, Wang D, Li S, Rollinson D, Zhou X.** Economic cost analysis of malaria case  
50 management at the household level during the malaria elimination phase in The People's  
51 Republic of China. *Infect Dis Poverty.* 2016 Jun 3;5(1):50. doi: 10.1186/s40249-016-0141-x.  
52  
53  
54  
55  
56  
57  
58  
59  
60



- 1  
2  
3  
4  
5  
6  
7  
8  
9  
10  
11  
12  
13  
14  
15  
16  
17  
18  
19  
20  
21  
22  
23  
24  
25  
26  
27  
28  
29  
30  
31  
32  
33  
34  
35  
36  
37  
38  
39  
40  
41  
42  
43  
44  
45  
46  
47  
48  
49  
50  
51  
52  
53  
54  
55  
56  
57  
58  
59  
60
- 16. Kyaw SS, Drake T, Ruangveerayuth R, Chierakul W, White NJ, Newton PN, Lubell Y.** Cost of treating inpatient falciparum malaria on the Thai-Myanmar border. *Malar J.* 2014 Oct 29; 13:416. doi: 10.1186/1475-2875-13-416. Page 16 of 105
- 17. Beogo, Huang N, Drabo MK, Yé Y.** Malaria related care-seeking-behaviour and expenditures in urban settings: A household survey in Ouagadougou, Burkina Faso. *Acta Trop.* 2016 Aug; 160:78-85. doi: 10.1016/j.actatropica.2016.03.033. Epub 2016 May 3.
- 18. Adair FR, Holmgren LR.** Do drug samples influence resident prescribing behavior? A randomized trial. *The American Journal of Medicine* Volume 118, Issue 8, August 2005, Pages 881-88
- 19. Soremekun S, Kasteng F, Lingam R, Vassall A, Kertho E, Settumba S, Etou PL, Nanyonjo A, Ten Asbroek G, Kallander K, Kirkwood B; inSCALE Study Group.** Variation in the quality and out-of-pocket cost of treatment for childhood malaria, diarrhoea, and pneumonia: Community and facility based care in rural Uganda. *PLoS One.* 2018 Nov 26;13(11):e0200543. doi: 10.1371/journal.pone.0200543. eCollection 2018.
- 20. Nabyonga O, Mugisha F, Okui A, Musango L, Kirigia J.** Health care seeking patterns and determinants of out-of-pocket expenditure for malaria for the children under-five in Uganda. *Malar J.* 2013 May 31; 12:175. doi: 10.1186/1475-2875-12-175.

## CHEERS checklist—Items to include when reporting economic evaluations of health interventions

| Section/item                                           | Item No | Recommendation                                                                                                                                                                                                                                                                                                              | Reported on page No/<br>line No                      |
|--------------------------------------------------------|---------|-----------------------------------------------------------------------------------------------------------------------------------------------------------------------------------------------------------------------------------------------------------------------------------------------------------------------------|------------------------------------------------------|
| <b>Title and abstract</b>                              |         |                                                                                                                                                                                                                                                                                                                             |                                                      |
| Title                                                  | 1       | Identify the study as an economic evaluation or use more specific terms such as “cost-effectiveness analysis”, and describe the interventions compared.                                                                                                                                                                     | page 1, line 2                                       |
| Abstract                                               | 2       | Provide a structured summary of objectives, perspective, setting, methods (including study design and inputs), results (including base case and uncertainty analyses), and conclusions.                                                                                                                                     | page 2, line 10 to 33                                |
| <b>Introduction</b>                                    |         |                                                                                                                                                                                                                                                                                                                             |                                                      |
| Background and objectives                              | 3       | Provide an explicit statement of the broader context for the study.                                                                                                                                                                                                                                                         | page 2, line 16 to 30                                |
|                                                        |         | Present the study question and its relevance for health policy or practice decisions.                                                                                                                                                                                                                                       | page 2, line 34 to 36                                |
| <b>Methods</b>                                         |         |                                                                                                                                                                                                                                                                                                                             |                                                      |
| Target population and subgroups                        | 4       | Describe characteristics of the base case population and subgroups analysed, including why they were chosen.                                                                                                                                                                                                                | page 4, line 7 to 12;                                |
| Setting and location                                   | 5       | State relevant aspects of the system(s) in which the decision(s) need(s) to be made.                                                                                                                                                                                                                                        | page 3, line 10 to 24                                |
| Study perspective                                      | 6       | Describe the perspective of the study and relate this to the costs being evaluated.                                                                                                                                                                                                                                         | page 1, line 12;<br>page 4, line 1;                  |
| Comparators                                            | 7       | Describe the interventions or strategies being compared and state why they were chosen.                                                                                                                                                                                                                                     | Not applicable since this was simply a cost analysis |
| Time horizon                                           | 8       | State the time horizon(s) over which costs and consequences are being evaluated and say why appropriate.                                                                                                                                                                                                                    | Not applicable since this was simply a cost analysis |
| Discount rate                                          | 9       | Report the choice of discount rate(s) used for costs and outcomes and say why appropriate.                                                                                                                                                                                                                                  | Not applicable since this was simply a cost analysis |
| Choice of health outcomes                              | 10      | Describe what outcomes were used as the measure(s) of benefit in the evaluation and their relevance for the type of analysis performed.                                                                                                                                                                                     | Not applicable since this was simply a cost analysis |
| Measurement of effectiveness                           | 11a     | <i>Single study-based estimates:</i> Describe fully the design features of the single effectiveness study and why the single study was a sufficient source of clinical effectiveness data.                                                                                                                                  | Not applicable since this was simply a cost analysis |
|                                                        | 11b     | <i>Synthesis-based estimates:</i> Describe fully the methods used for identification of included studies and synthesis of clinical effectiveness data.                                                                                                                                                                      |                                                      |
| Measurement and valuation of preference based outcomes | 12      | If applicable, describe the population and methods used to elicit preferences for outcomes.                                                                                                                                                                                                                                 | Not applicable since this was simply a cost analysis |
| Estimating resources and costs                         | 13a     | <i>Single study-based economic evaluation:</i> Describe approaches used to estimate resource use associated with the alternative interventions. Describe primary or secondary research methods for valuing each resource item in terms of its unit cost. Describe any adjustments made to approximate to opportunity costs. |                                                      |
|                                                        | 13b     | <i>Model-based economic evaluation:</i> Describe                                                                                                                                                                                                                                                                            | page 6, line 2 to                                    |

| Section/item                         | Item No | Recommendation                                                                                                                                                                                                                                                                                                                                        | Reported on page No/<br>line No                                                                                                                                             |
|--------------------------------------|---------|-------------------------------------------------------------------------------------------------------------------------------------------------------------------------------------------------------------------------------------------------------------------------------------------------------------------------------------------------------|-----------------------------------------------------------------------------------------------------------------------------------------------------------------------------|
|                                      |         | approaches and data sources used to estimate resource use associated with model health states. Describe primary or secondary research methods for valuing each resource item in terms of its unit cost. Describe any adjustments made to approximate to opportunity costs.                                                                            | page 6.                                                                                                                                                                     |
| Currency, price date, and conversion | 14      | Report the dates of the estimated resource quantities and unit costs. Describe methods for adjusting estimated unit costs to the year of reported costs if necessary. Describe methods for converting costs into a common currency base and the exchange rate.                                                                                        | page 6, table 7 to 9;                                                                                                                                                       |
| Choice of model                      | 15      | Describe and give reasons for the specific type of decision-analytical model used. Providing a figure to show model structure is strongly recommended.                                                                                                                                                                                                | page 6, line 23 to 25;                                                                                                                                                      |
| Assumptions                          | 16      | Describe all structural or other assumptions underpinning the decision-analytical model.                                                                                                                                                                                                                                                              | Assumption of linearity was made                                                                                                                                            |
| Analytical methods                   | 17      | Describe all analytical methods supporting the evaluation. This could include methods for dealing with skewed, missing, or censored data; extrapolation methods; methods for pooling data; approaches to validate or make adjustments (such as half cycle corrections) to a model; and methods for handling population heterogeneity and uncertainty. | page 6, line 23 to 25;                                                                                                                                                      |
| <b>Results</b>                       |         |                                                                                                                                                                                                                                                                                                                                                       |                                                                                                                                                                             |
| Study parameters                     | 18      | Report the values, ranges, references, and, if used, probability distributions for all parameters. Report reasons or sources for distributions used to represent uncertainty where appropriate. Providing a table to show the input values is strongly recommended.                                                                                   | page 7, line 1 to 15;<br>page 7, Table 3;<br>page 9, Table 4;<br>page 10, table 5;<br>page 11, table 6;<br>page 11, line 19 to<br>page 12 line 2;<br>page 12, line 3 to 16; |
| Incremental costs and outcomes       | 19      | For each intervention, report mean values for the main categories of estimated costs and outcomes of interest, as well as mean differences between the comparator groups. If applicable, report incremental cost-effectiveness ratios.                                                                                                                | Not Applicable                                                                                                                                                              |
| Characterising uncertainty           | 20a     | <i>Single study-based economic evaluation:</i> Describe the effects of sampling uncertainty for the estimated incremental cost and incremental effectiveness parameters, together with the impact of methodological assumptions (such as discount rate, study perspective).                                                                           |                                                                                                                                                                             |
|                                      | 20b     | <i>Model-based economic evaluation:</i> Describe the effects on the results of uncertainty for all input parameters, and uncertainty related to the structure of the model and assumptions.                                                                                                                                                           | Not applicable                                                                                                                                                              |
| Characterising heterogeneity         | 21      | If applicable, report differences in costs, outcomes, or cost-effectiveness that can be explained by variations between subgroups of patients with different baseline characteristics or other observed variability in effects that are not reducible by more information.                                                                            | not applicable                                                                                                                                                              |
| <b>Discussion</b>                    |         |                                                                                                                                                                                                                                                                                                                                                       |                                                                                                                                                                             |
| Study findings, limitations,         | 22      | Summarise key study findings and describe how they                                                                                                                                                                                                                                                                                                    | page 12, line 13 to                                                                                                                                                         |

| Section/item                                                                                                     | Item No | Recommendation                                                                                                                                                                                                                                    | Reported on page No/<br>line No                |
|------------------------------------------------------------------------------------------------------------------|---------|---------------------------------------------------------------------------------------------------------------------------------------------------------------------------------------------------------------------------------------------------|------------------------------------------------|
| generalisability, and current knowledge                                                                          |         | support the conclusions reached. Discuss limitations and the generalisability of the findings and how the findings fit with current knowledge.                                                                                                    | page 14, line 3                                |
| <b>Other</b>                                                                                                     |         |                                                                                                                                                                                                                                                   |                                                |
| Source of funding                                                                                                | 23      | Describe how the study was funded and the role of the funder in the identification, design, conduct, and reporting of the analysis. Describe other non-monetary sources of support.                                                               | Information provided via the submission system |
| Conflicts of interest                                                                                            | 24      | Describe any potential for conflict of interest of study contributors in accordance with journal policy. In the absence of a journal policy, we recommend authors comply with International Committee of Medical Journal Editors recommendations. | Information provided via the submission system |
| For consistency, the CHEERS statement checklist format is based on the format of the CONSORT statement checklist |         |                                                                                                                                                                                                                                                   |                                                |
